# Supplementary material
Source: PubMed Central journal article supplement (PMC5338669)
Supplement: supp_pp.16.01516_PP2016-01516R2_Supplemental_Information.pdf [file supp_pp.16.01516_PP2016-01516R2_Supplemental_Information.pdf]

---

1 **Supplementary Figures 1-10**

2 **Supplementary Figure 1** Maize image analysis and traits extraction.

3 **Supplementary Figure 2** Distribution of QTL mapping resolution.

4 **Supplementary Figure 3** Correlation coefficients between paired traits for 42 traits investigated at 16 time points.

5 **Supplementary Figure 4** Chromosomal distribution of identified QTLs with 42 primary phenotypic traits and 64 growth related traits.

6 **Supplementary Figure 5** Comparison of heat maps for QTLs density between metabolic and investigated phenotypic traits in By804/B73  
7 recombination population.

8 **Supplementary Figure 6** Predication ability comparison of 6 models for digital biomass accumulation.

9 **Supplementary Figure 7** The RNA-seq gene atlas for four genes (GRMZM2G180490, GRMZM2G010702, GRMZM2G151649 and  
10 GRMZM2G057023).

11 **Supplementary Figure 8** Experimental design.

12 **Supplementary Figure 9** The image analysis interface designed in the study.

13 **Supplementary Figure 10** The flow chart of the program. The number represents the processing module of the following figure 1~10.

14

15 **Supplementary Tables 1-12**

16 **Supplementary Table 1** The 106 traits classification and abbreviation.

17 **Supplementary Table 2** Statistical summary of the 10 developed models for fresh weight estimation (sample size = 387).

---

18      **Supplementary Table 3** Statistical summary of the 10 developed models for dry weight estimation (sample size = 387).

19      **Supplementary Table 4** Summary of QTL for Growth Rate Related Trait Identified at Sixteen Time Points.

20      **Supplementary Table 5** Statistical summary of the 6 developed models for digital biomass accumulation (167 samples  $\times$  16 time points).

21      **Supplementary Table 6** Detecting the phenotypic traits (not include growth related traits) significantly associated with yield (Tons per

22      hectare) and calculating the percentage of the phenotypic variance explanation ( $R^2$ ).

23      **Supplementary Table 7** The statistical details of coefficients in selected model for yield (time points: 1, 8, 9, 16 in the Supplementary

24      Table 6).

25      **Supplementary Table 8** Candidate genes and their annotations located in the first three peak bins in QTL hot spot located on chromosome

26      10.

27      **Supplementary Table 9** Candidate genes and their annotations located in the first three peak bins in QTL hot spot located on chromosome

28      7.

29      **Supplementary Table 10** Comparison of published work for combination of high-throughput phenotyping and QTL/GWAS analysis.

30      **Supplementary Table 11** Experimental schedule of maize plant phenotyping.

31      **Supplementary Table 12** The detailed information of Sub-vi and Dynamic link library (DLL) used in the study.

32      **Supplementary Notes 1** Definition of the features.

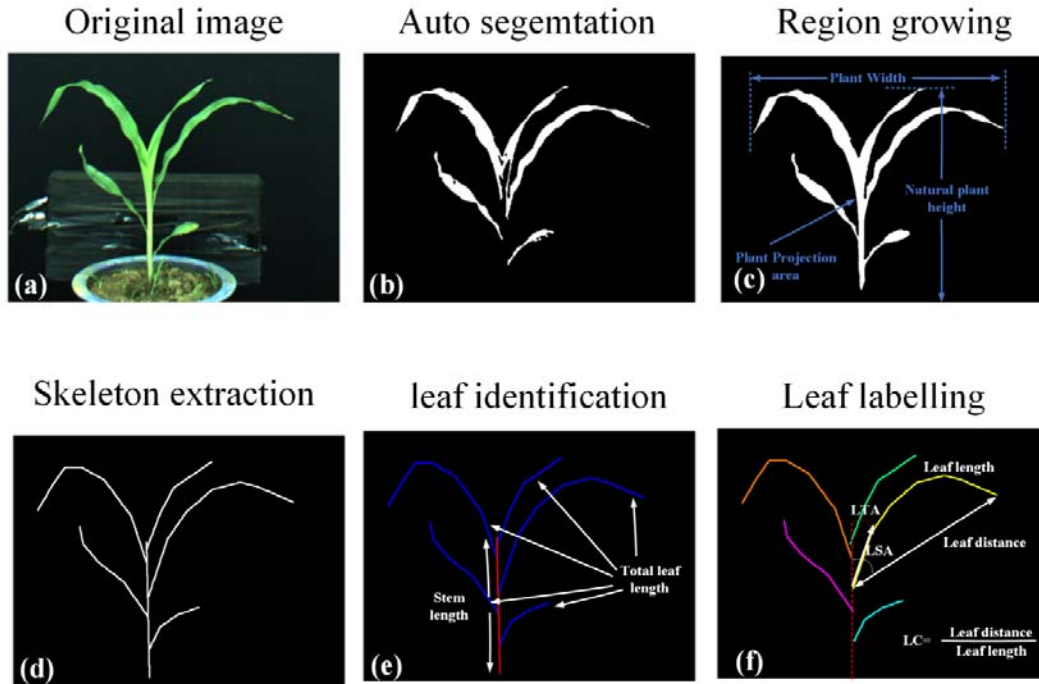

33

34 **Supplementary Figure 1 Maize image analysis and traits extraction.** (a) The  
 35 side-view image with maximum area was selected in 15 side-view images; (b) ExG  
 36 component was extracted and the OTSU method was applied to obtain the binary  
 37 image; (c) Specified region growing algorithm was developed to acquire the whole  
 38 plant image, then plant morphological traits, color traits, biomass related traits, and  
 39 histogram traits were extracted; (d) The parallel thinning algorithm was used to  
 40 extract the skeleton image; (e) The Hough transformation was applied to recognize  
 41 the stem skeleton; (f) Each leaf branch was identified, meanwhile, leaf architecture  
 42 traits were calculated during the image analysis process. With biomass (fresh  
 43 weights and dry weights) at different time points were obtained, growth related traits  
 44 were calculated.

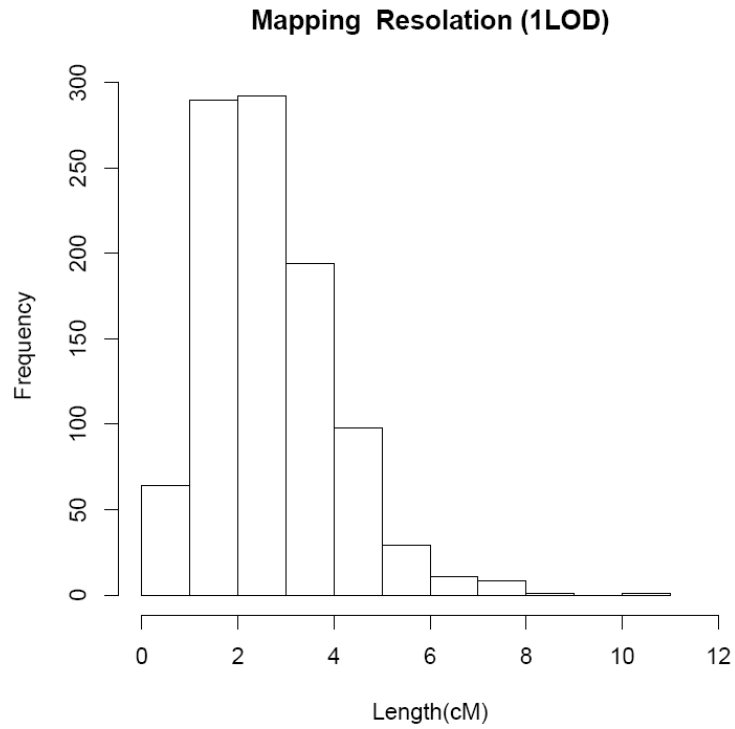

45

46

47 **Supplementary Figure 2 Distribution of QTL mapping resolution.**

48 Confidence interval for each QTL was assigned as one-LOD drop of the peak which

49 was regarded as mapping resolution.

50

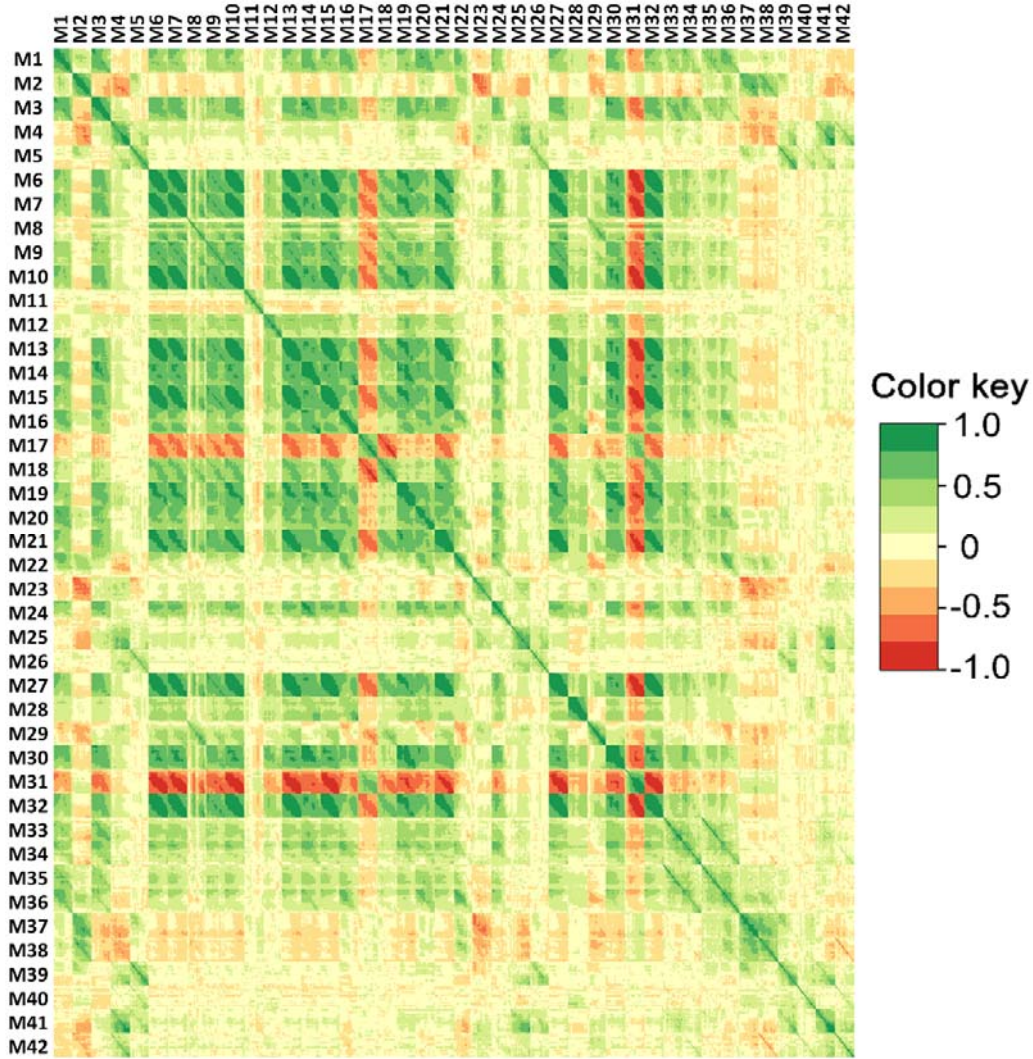

51

52 **Supplementary Figure 3 Correlation coefficients between paired traits for 42**

53 **traits investigated at 16 time points.** The x axis from left to right and y axis from

54 top to bottom indicate time points (e.g. from T1 to T16) for each of 42 traits. M1,

55 LNL; M2, LC; M3, SLL; M4, LSA; M5, LTA; M6, DW; M7, E\_TEX; M8, FDIC;

56 M9, FDNIC; M10, FW; M11, GCV; M12, LN; M13, M\_TEX; M14, MPH; M15,

57 MU3\_TEX; M16, NPH; M17, PAR; M18, PC; M19, PP; M20, PW; M21, S\_TEX;

58 M22, SDLNL; M23, SDLC; M24, SDSLL; M25, SDLSA; M26, SDLTA; M27,

59 SE\_TEX; M28, SL; M29, TBR; M30, TLL; M31, U\_TEX; M32, SA; M33,

60 SLL\_below; M34, SLL\_above; M35, LNL\_below; M36, LNL\_above; M37,

61 LC\_below; M38, LC\_above; M39, LTA\_below; M40, LTA\_above; M41,

62 LSA\_below; M42, LSA\_above.

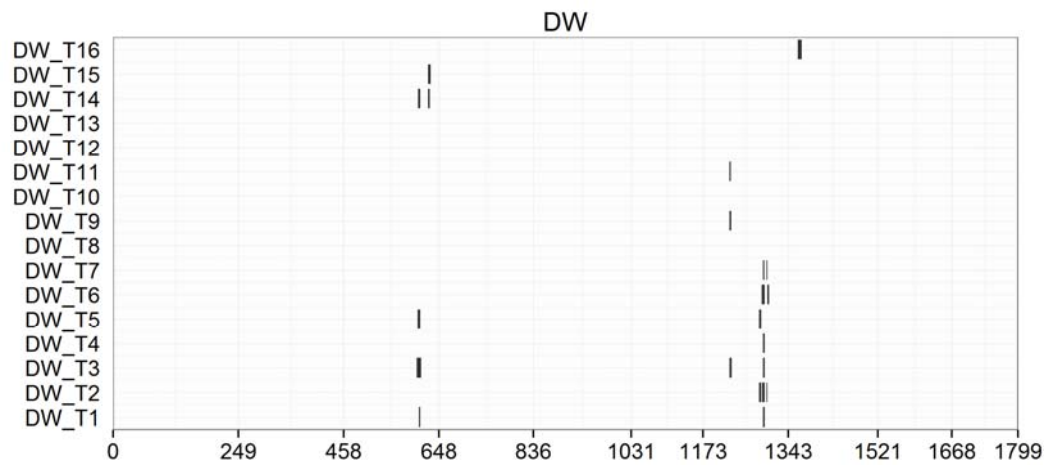

63

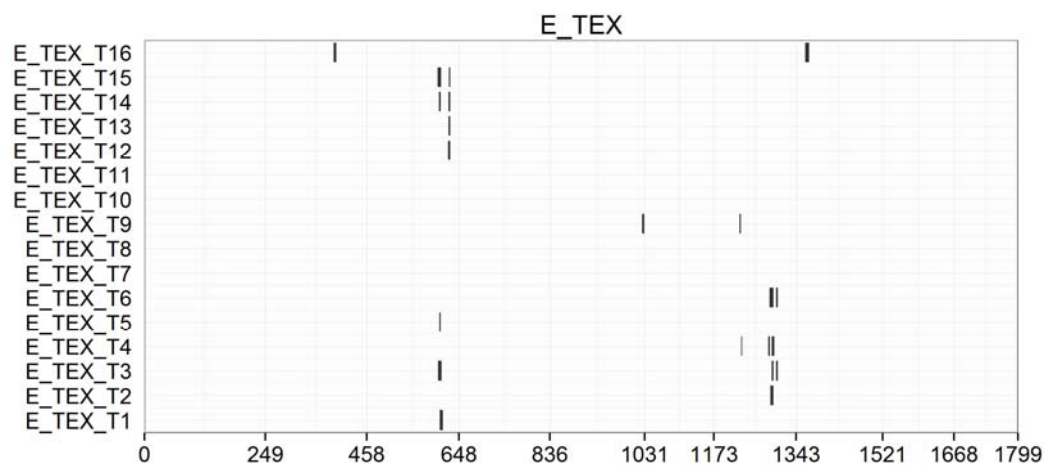

64

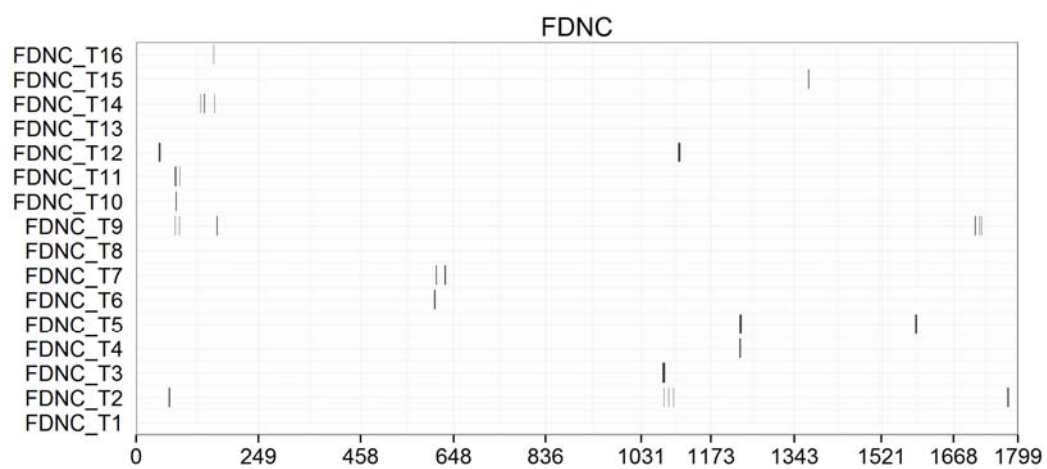

65

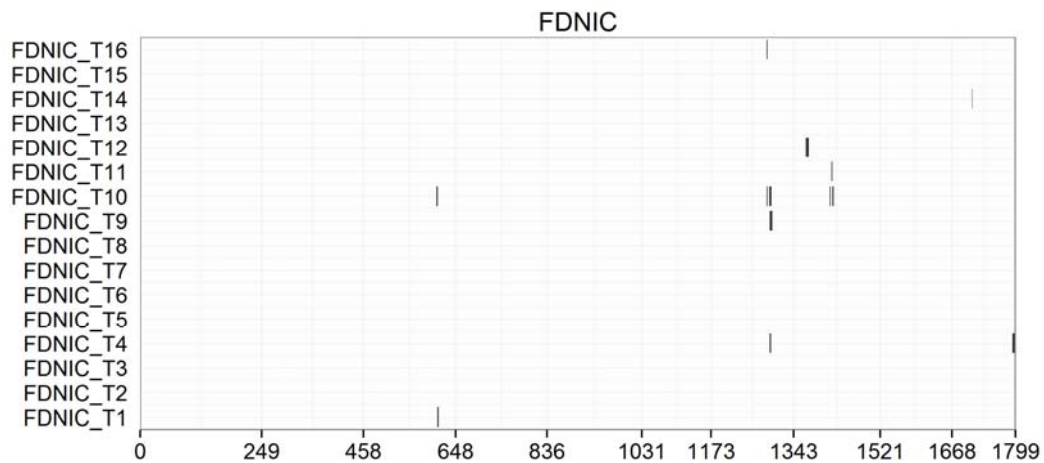

66

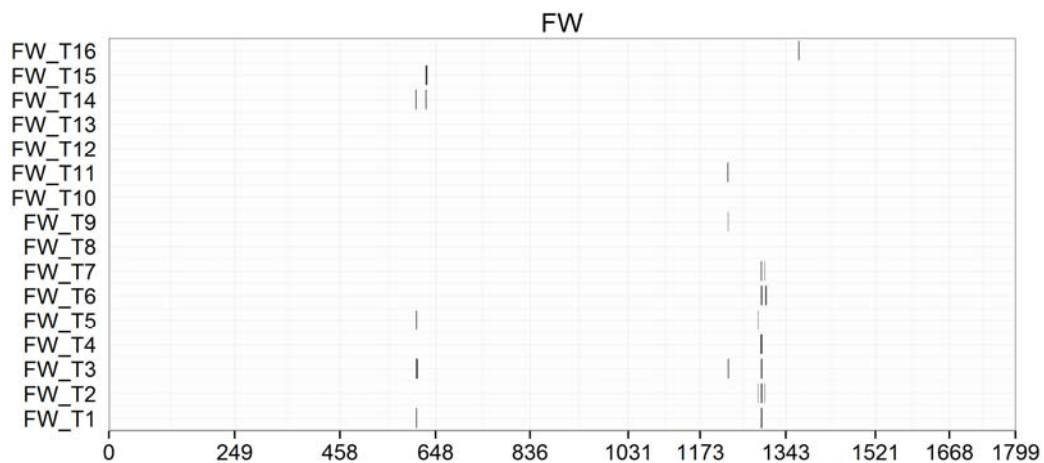

67

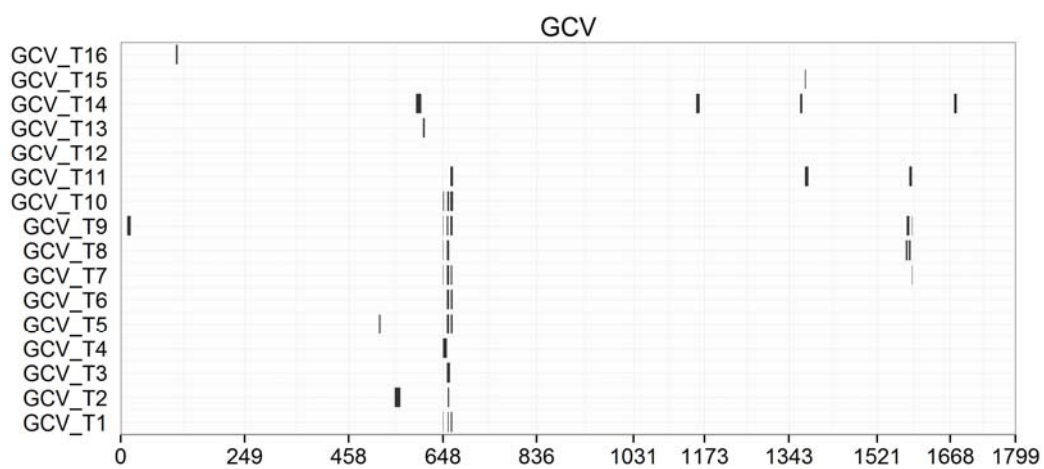

68

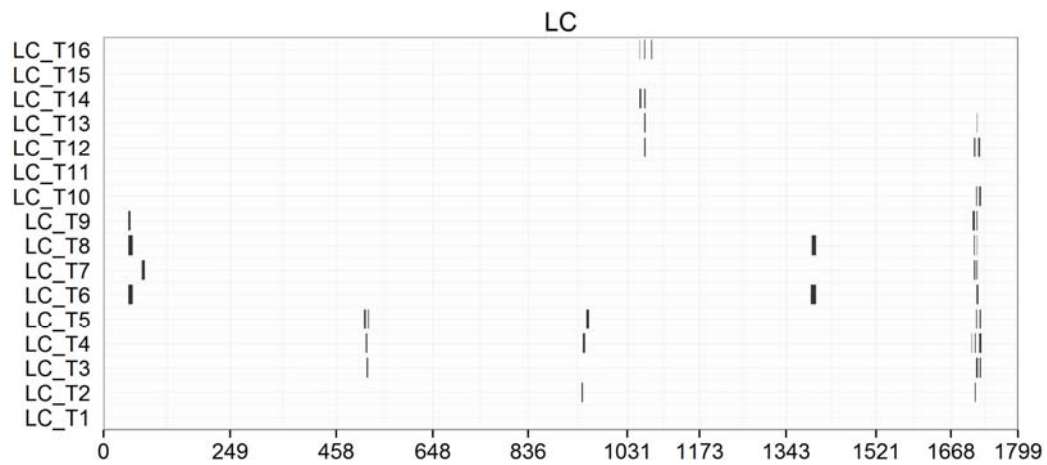

69

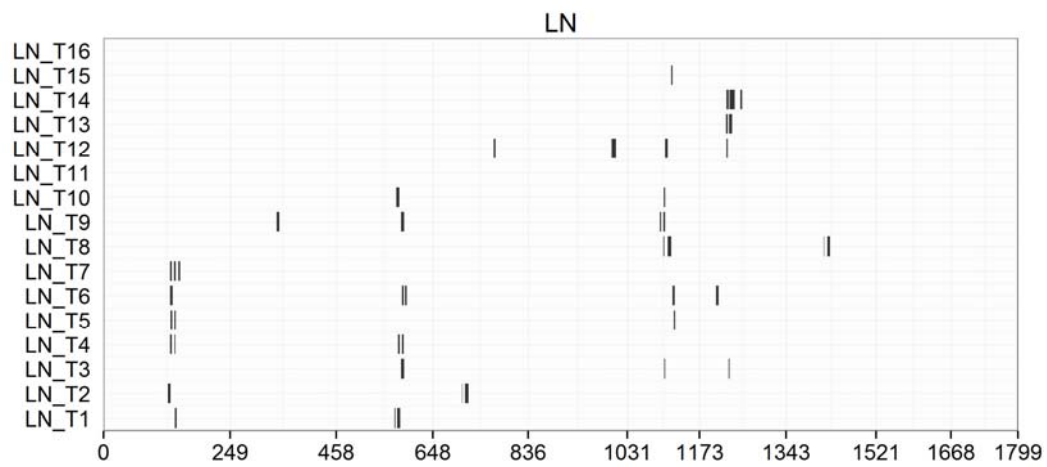

70

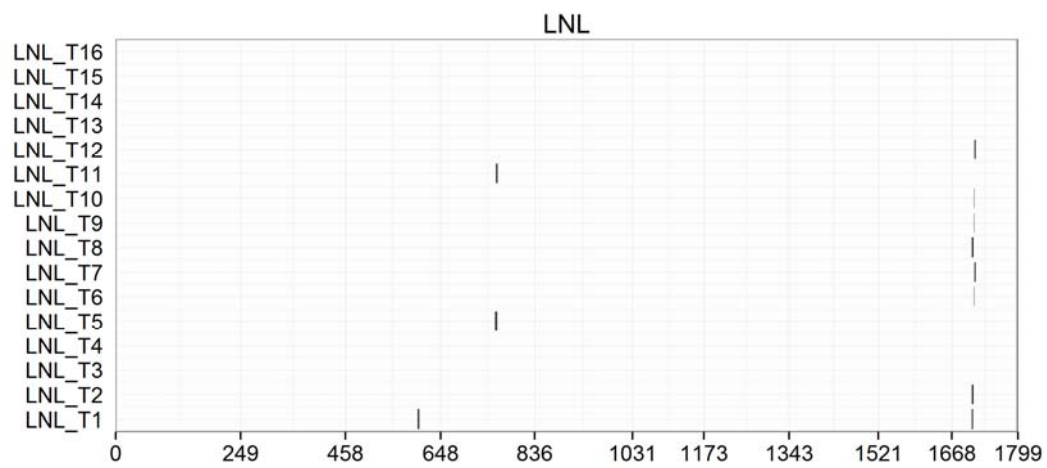

71

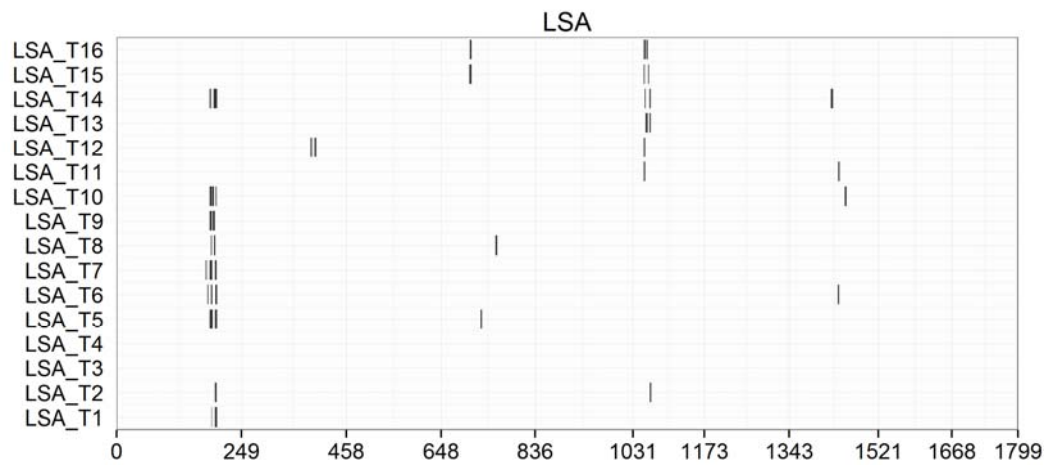

72

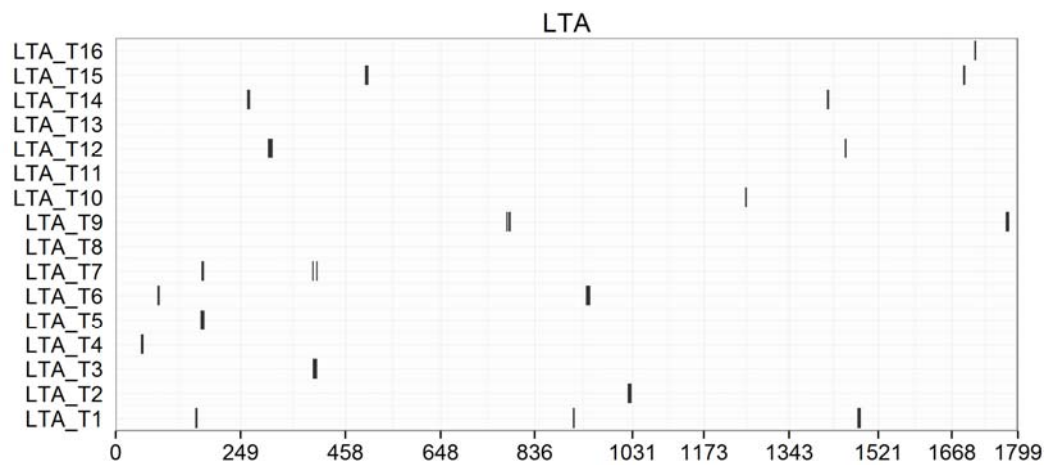

73

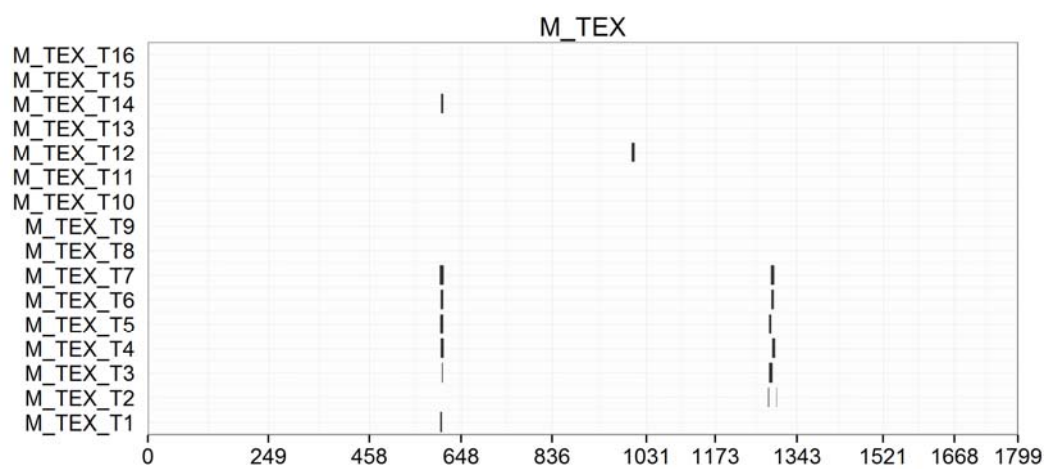

74

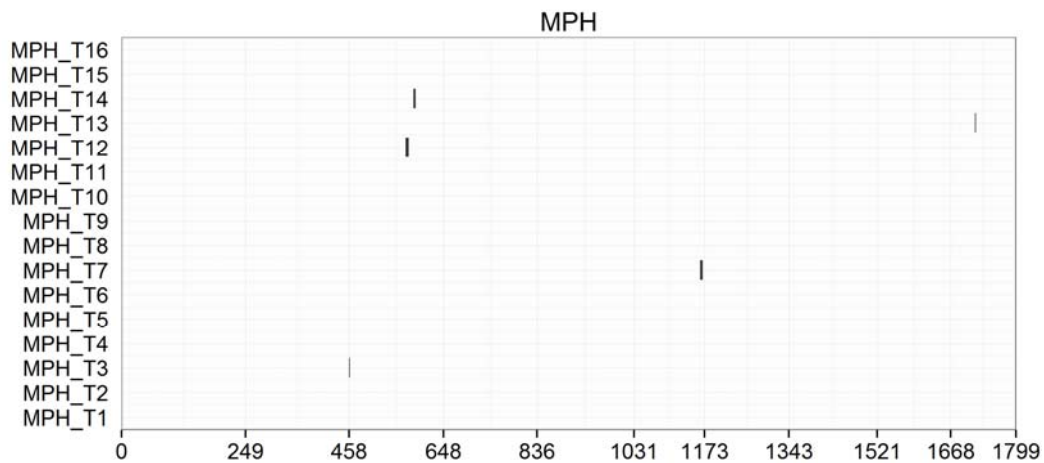

75

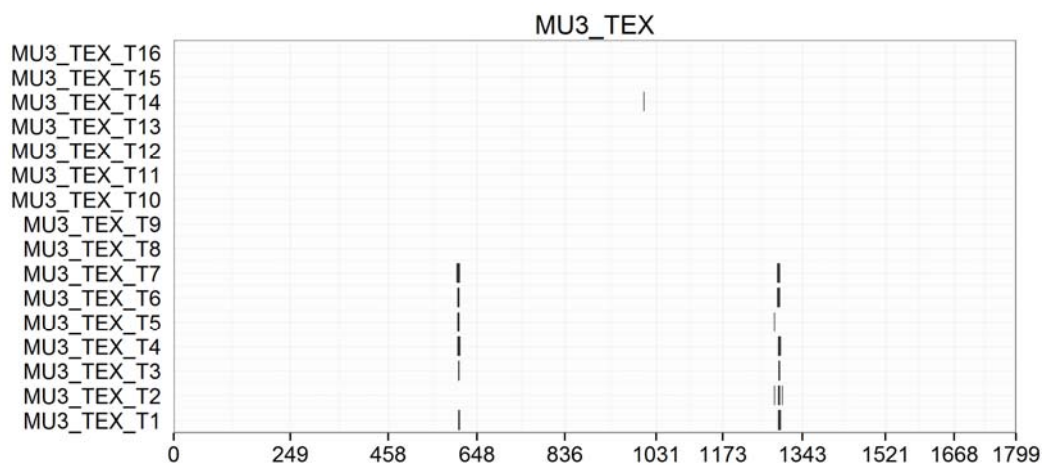

76

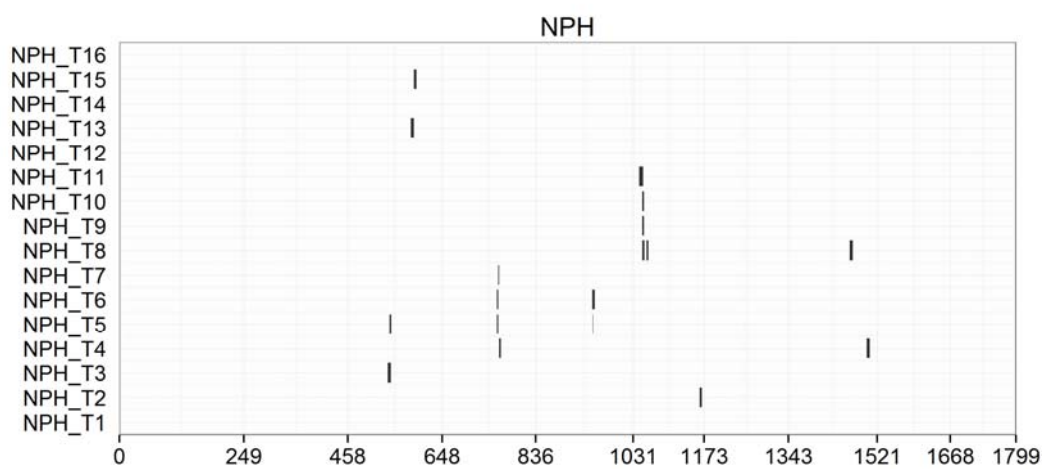

77

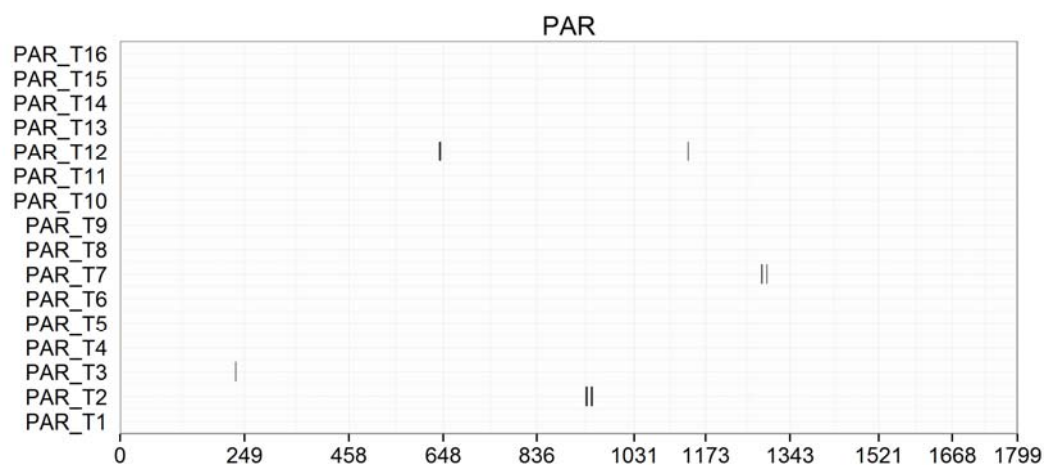

78

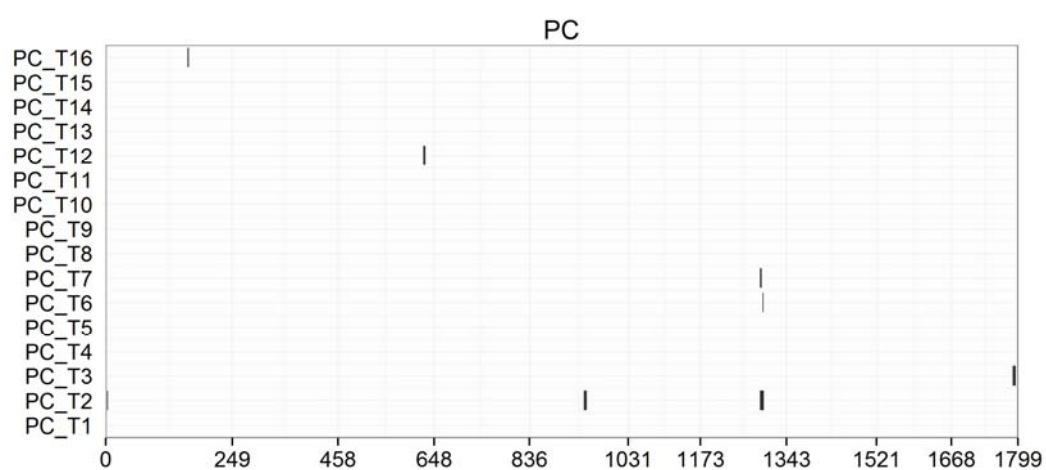

79

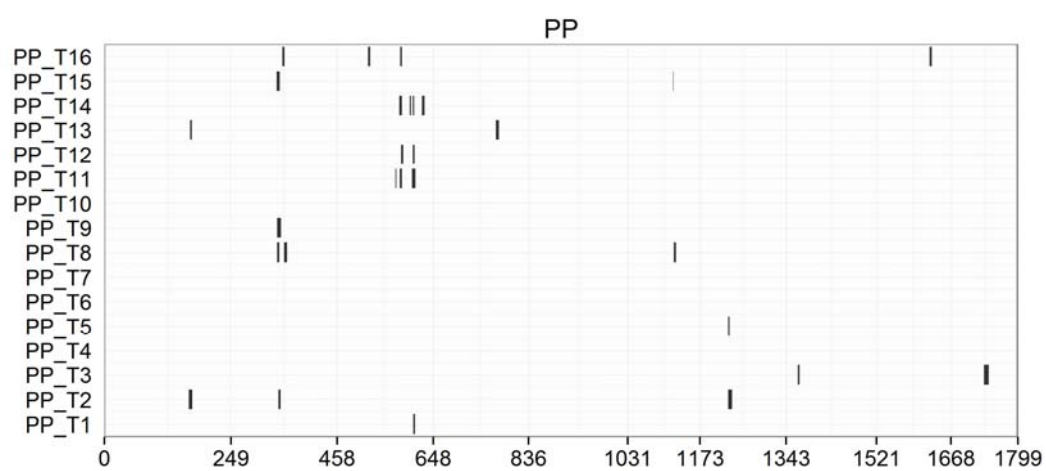

80

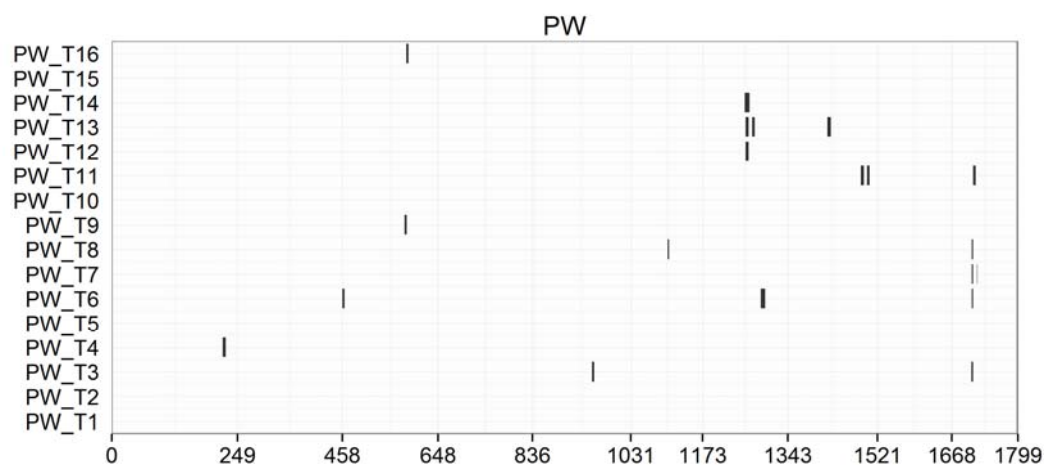

81

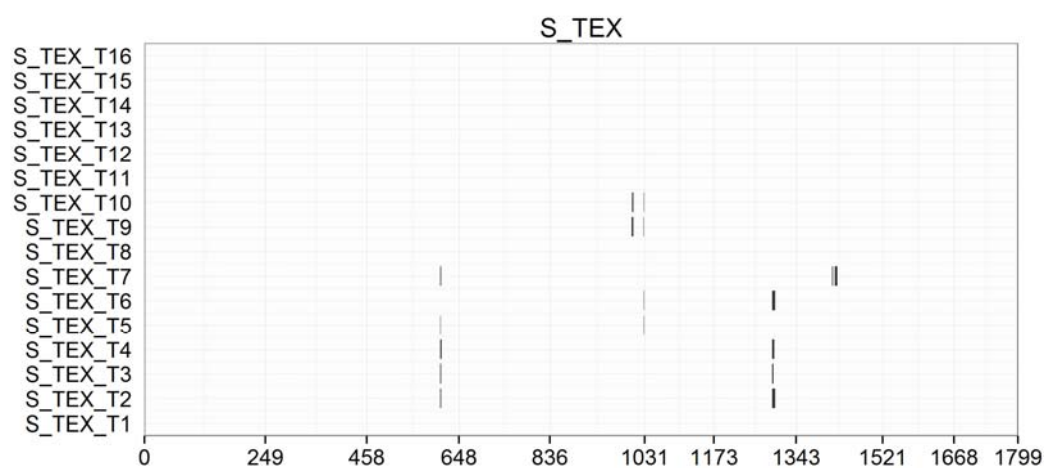

82

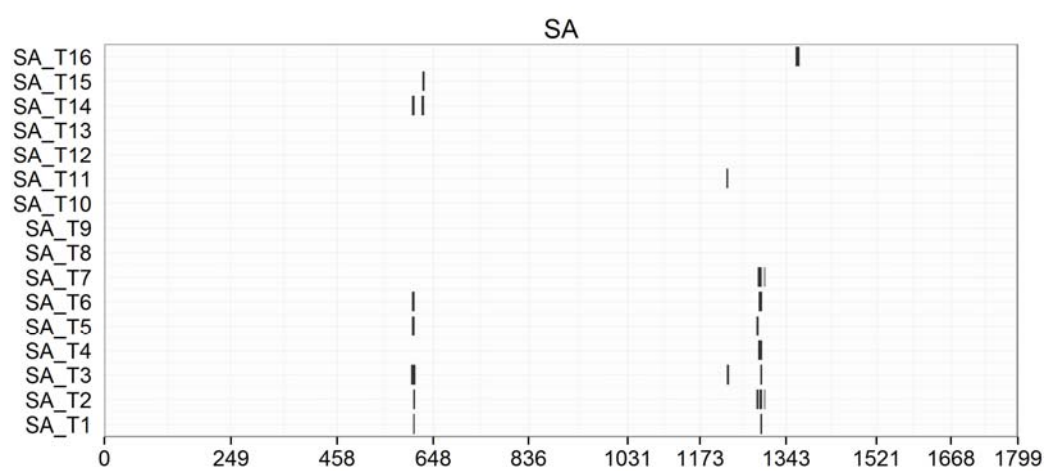

83

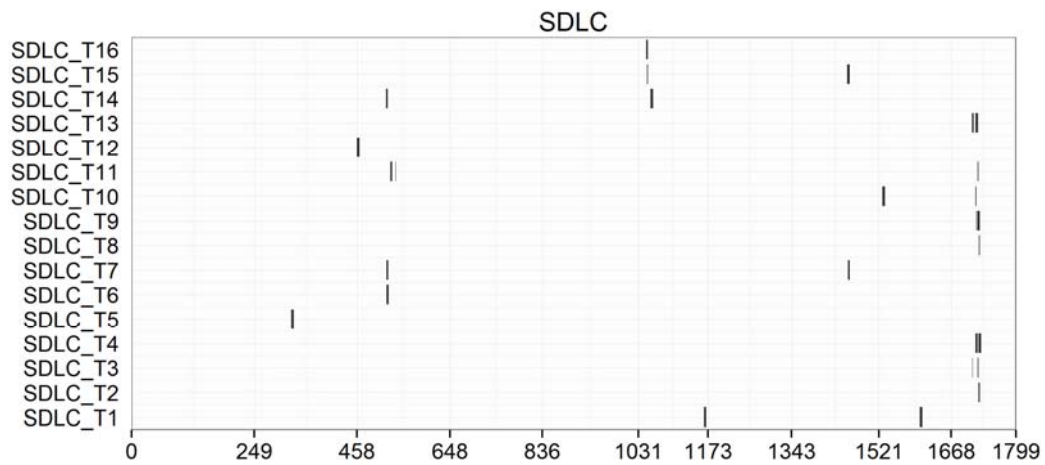

84

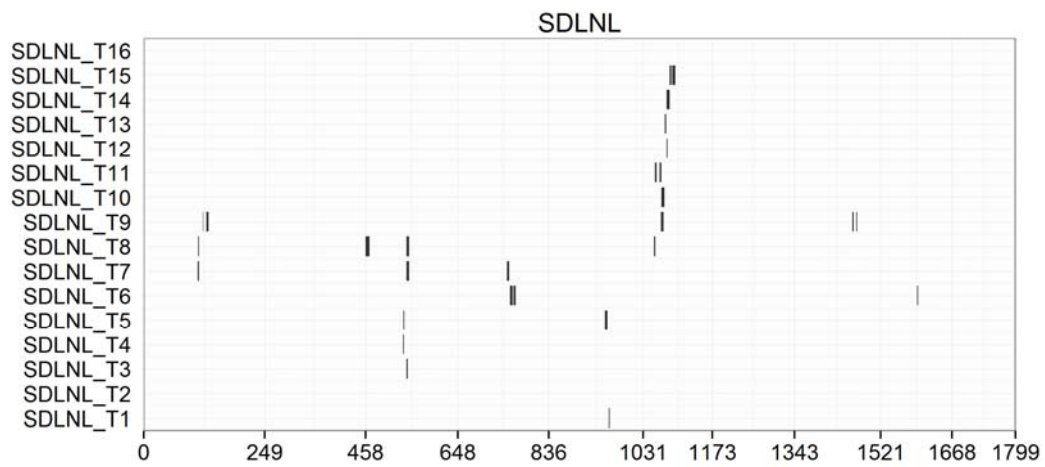

85

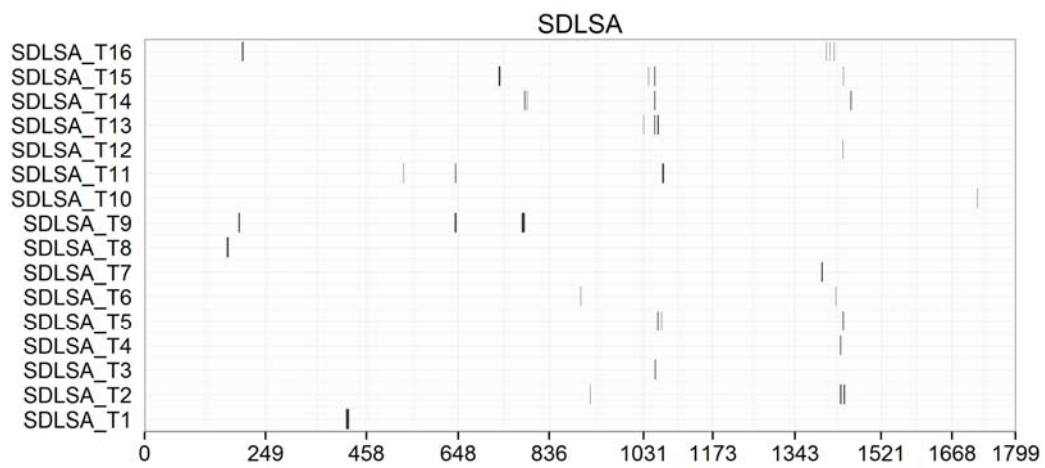

86

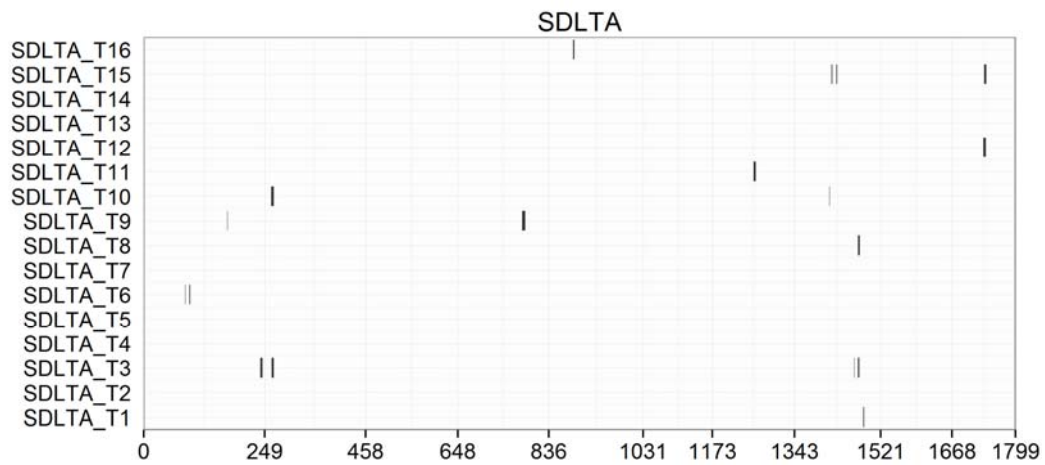

87

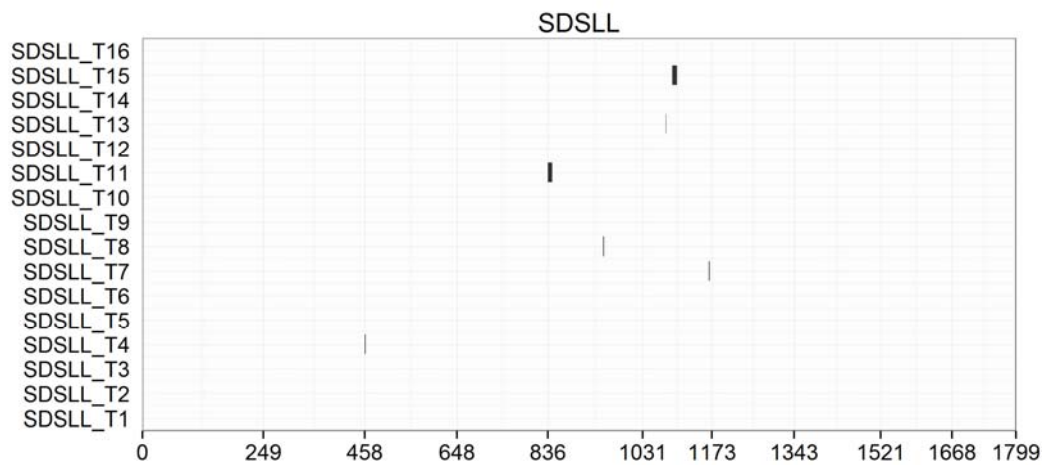

88

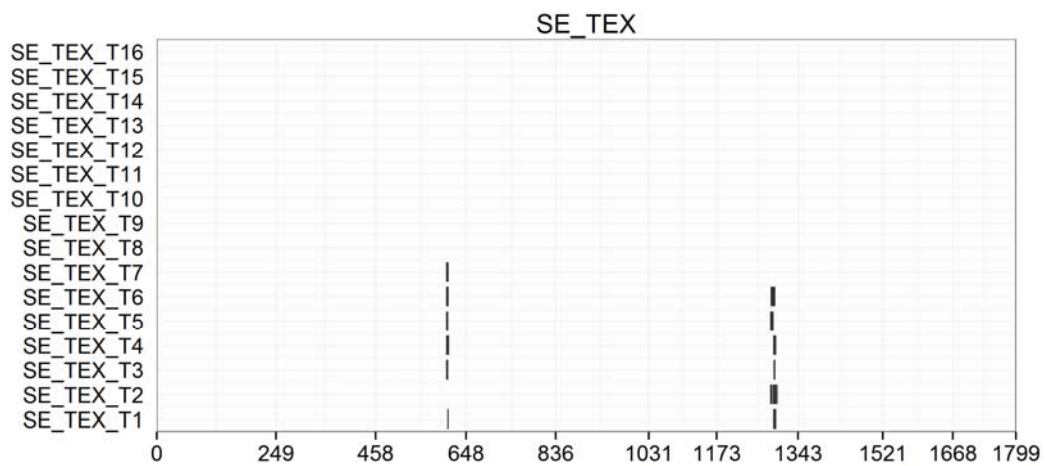

89

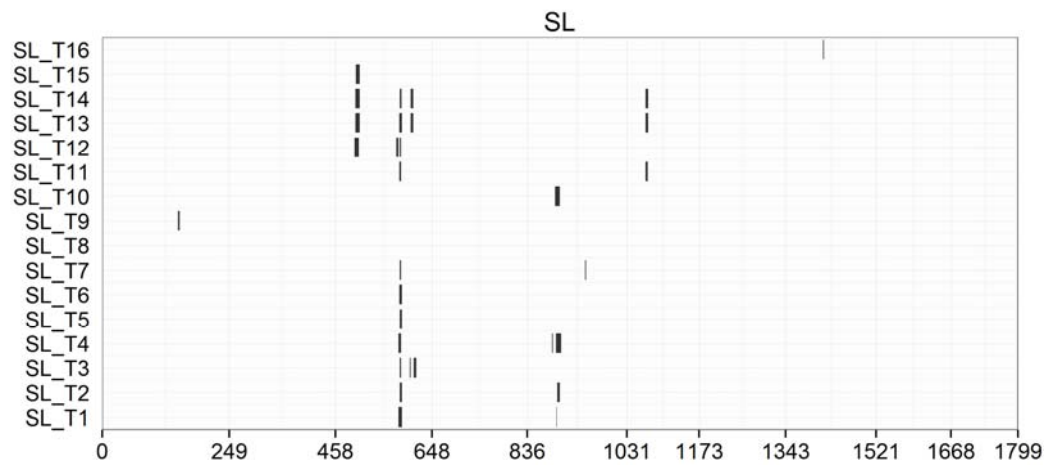

90

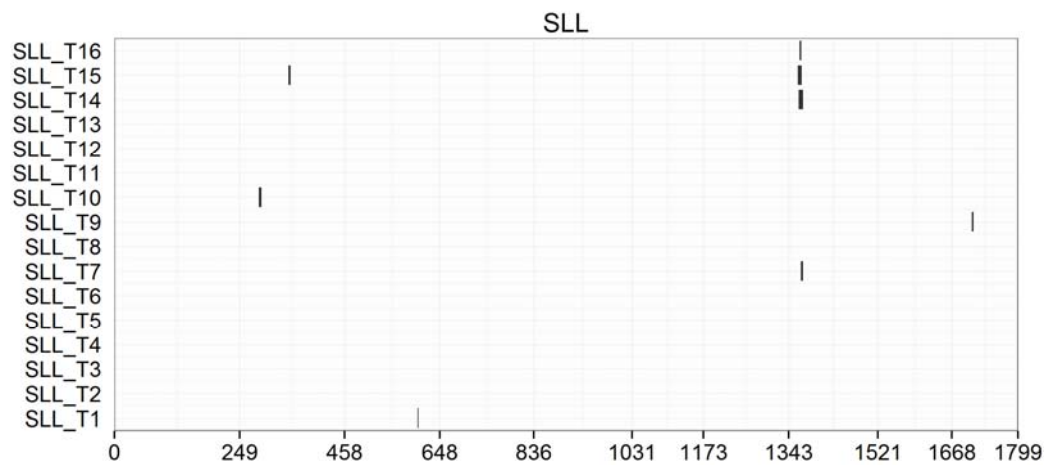

91

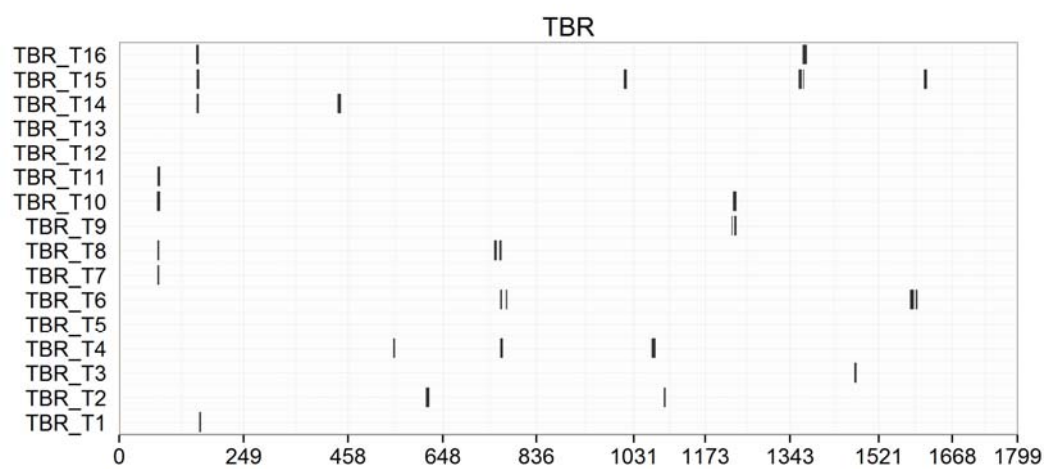

92

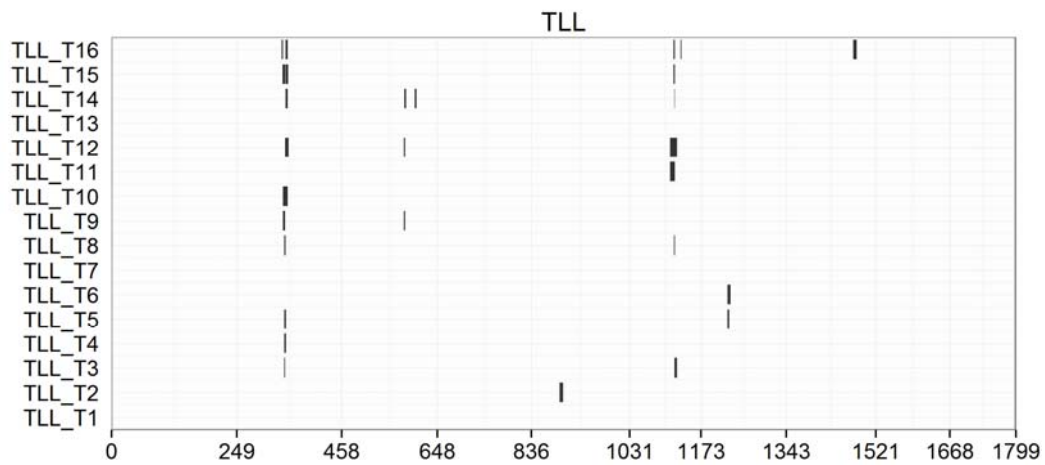

93

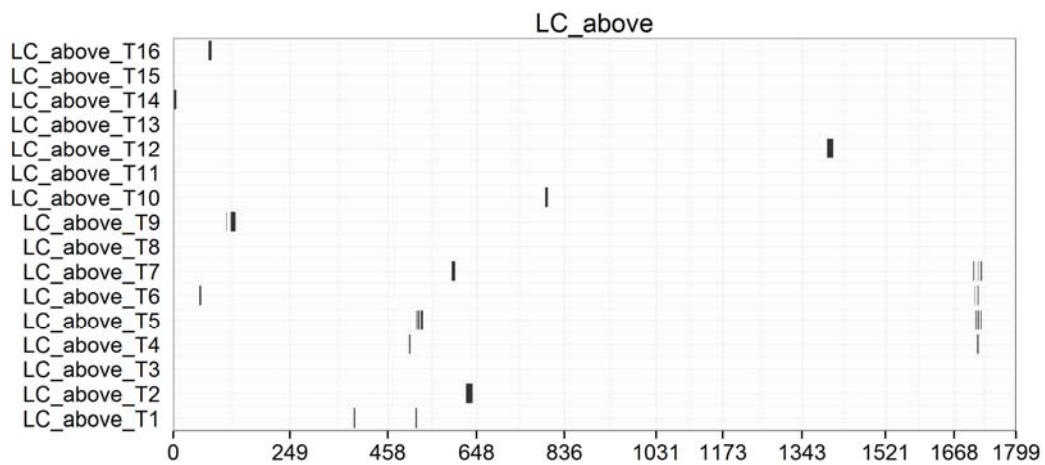

94

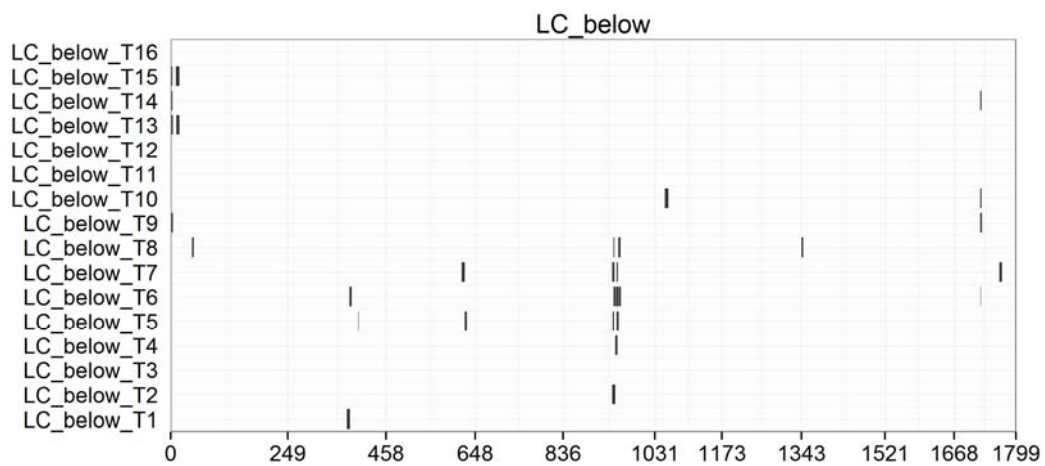

95

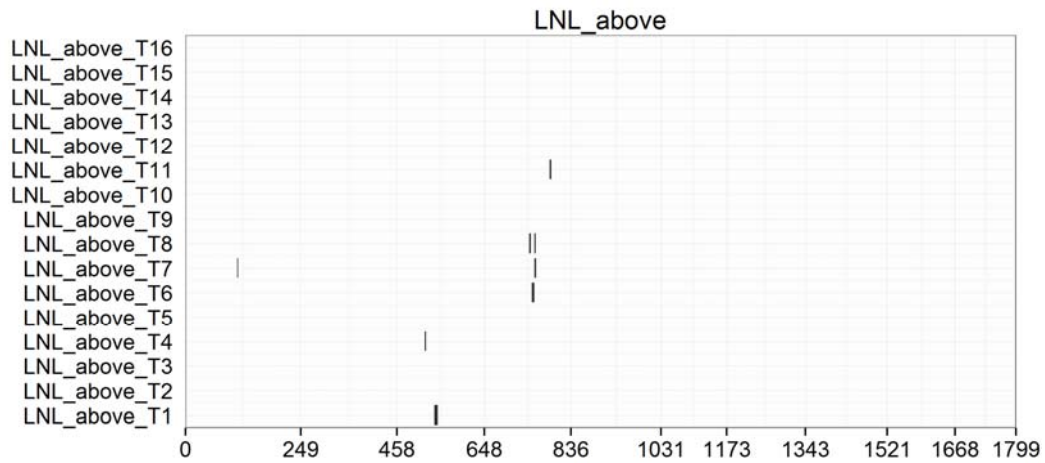

96

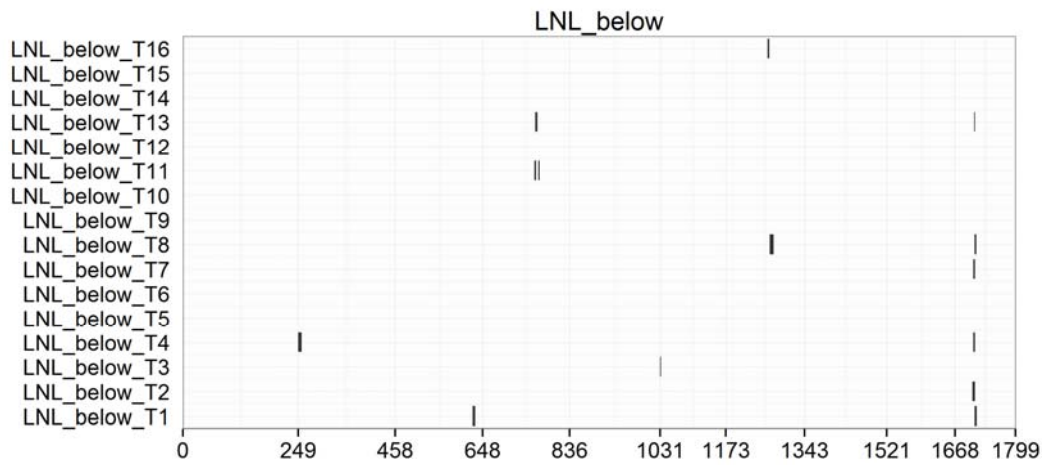

97

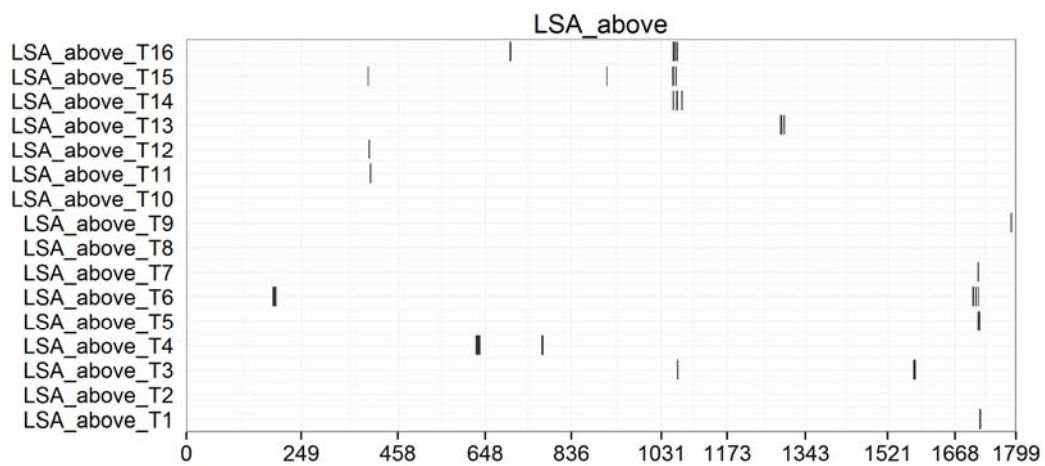

98

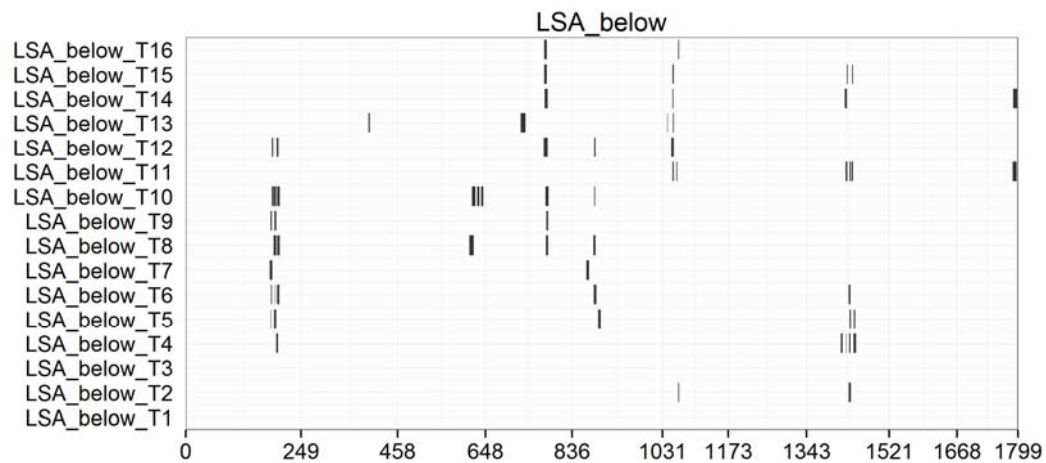

99

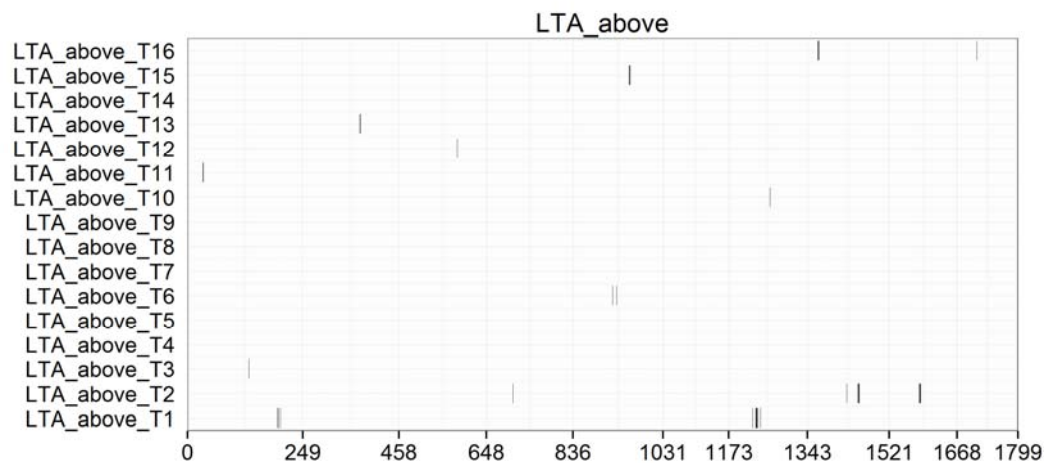

100

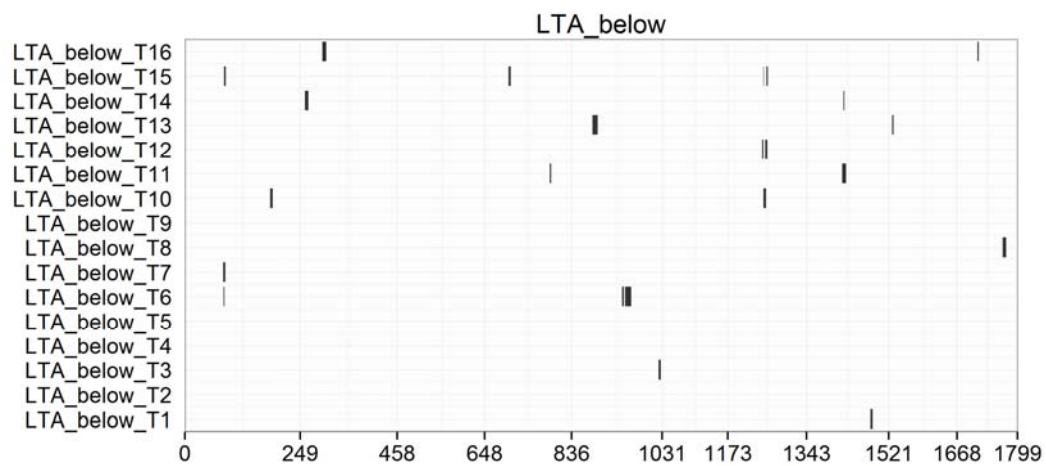

101

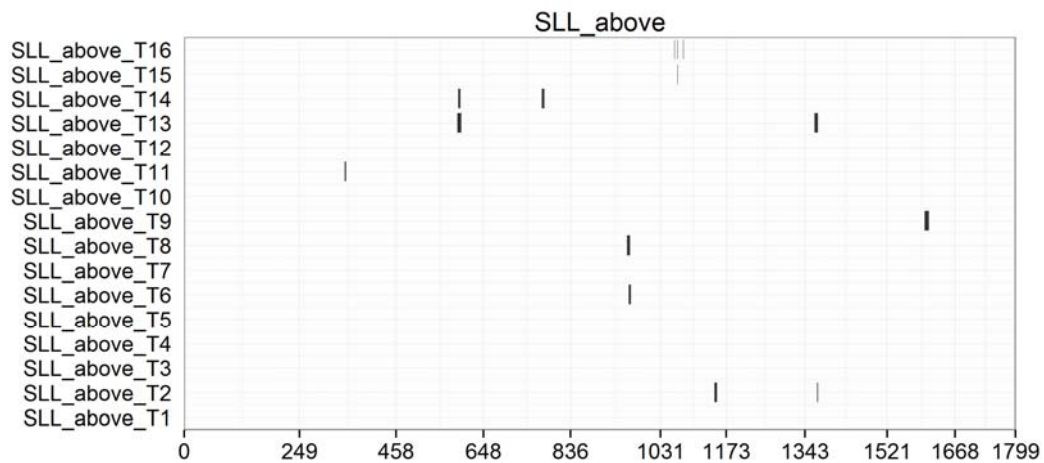

102

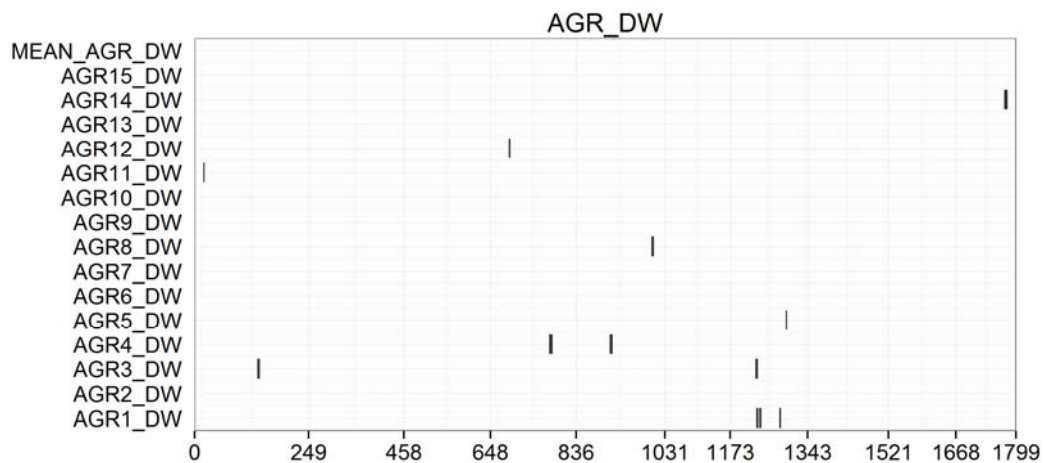

103

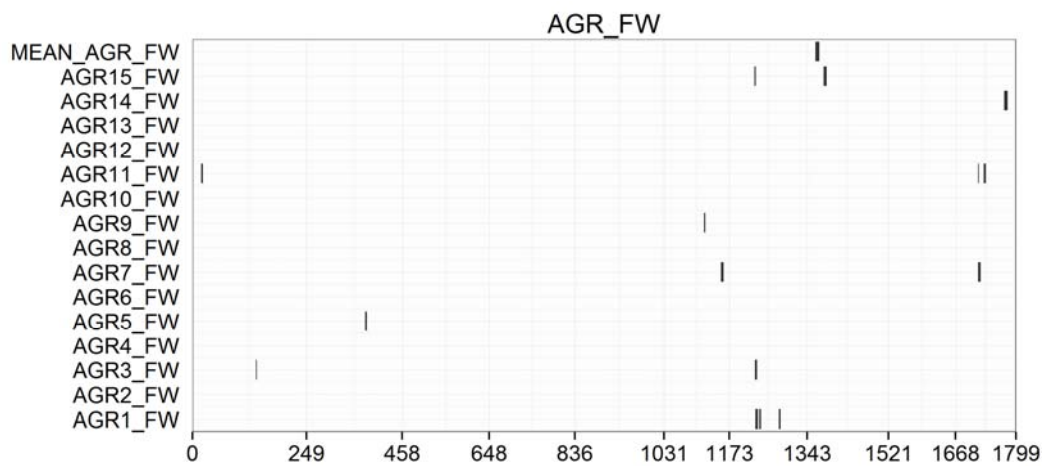

104

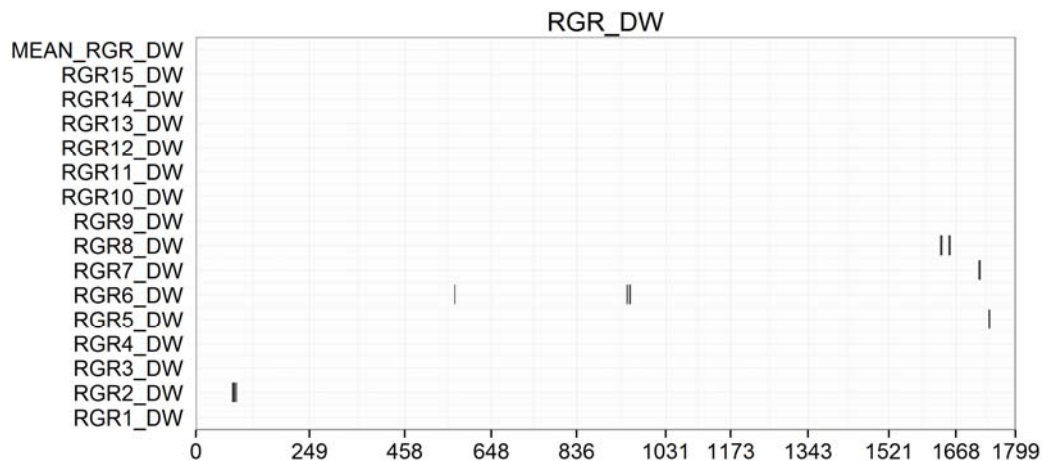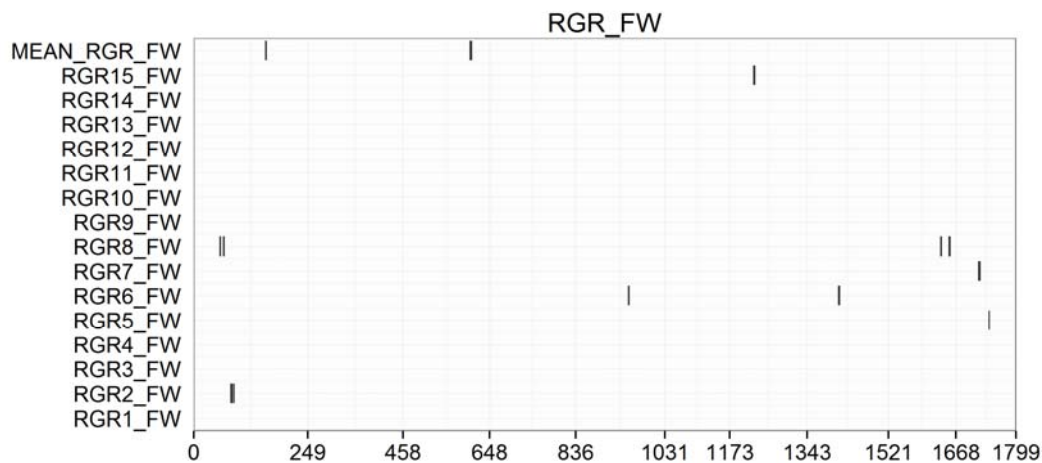

**Supplementary Figure 4 Chromosomal distribution of identified QTLs with 42 primary phenotypic traits and 64 growth related traits.** QTL regions (represented by the confidence interval for each QTL was assigned as 1-LOD drop of the peak) across the maize genome responsible for investigated phenotypic traits, growth rate related traits are shown as black solid rectangular boxes. The x axis indicates the genetic positions across the maize genome in cM. Detailed information of all detected QTLs is shown in Supplemental Data 2.

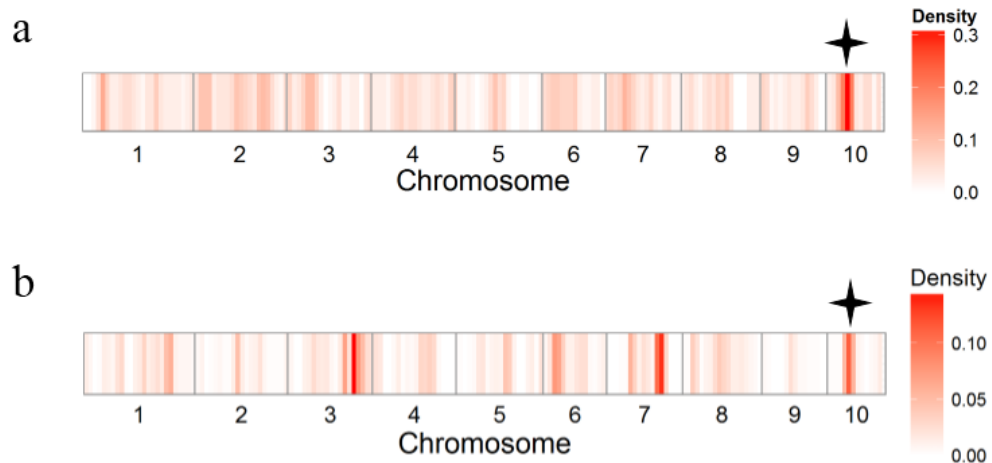

115

116 **Supplementary Figure 5 Comparison of heat maps for QTLs density between**  
 117 **metabolic and investigated phenotypic traits in By804/B73 recombination**  
 118 **population.** (a) Heat map of density of metabolic QTL across the genome. (b) Heat  
 119 map of density of investigated phenotypic traits QTL across the genome. The black  
 120 asterisk indicates the QTL hot regions on chromosome 10 were both detected in  
 121 metabolic and investigated phenotypic traits.

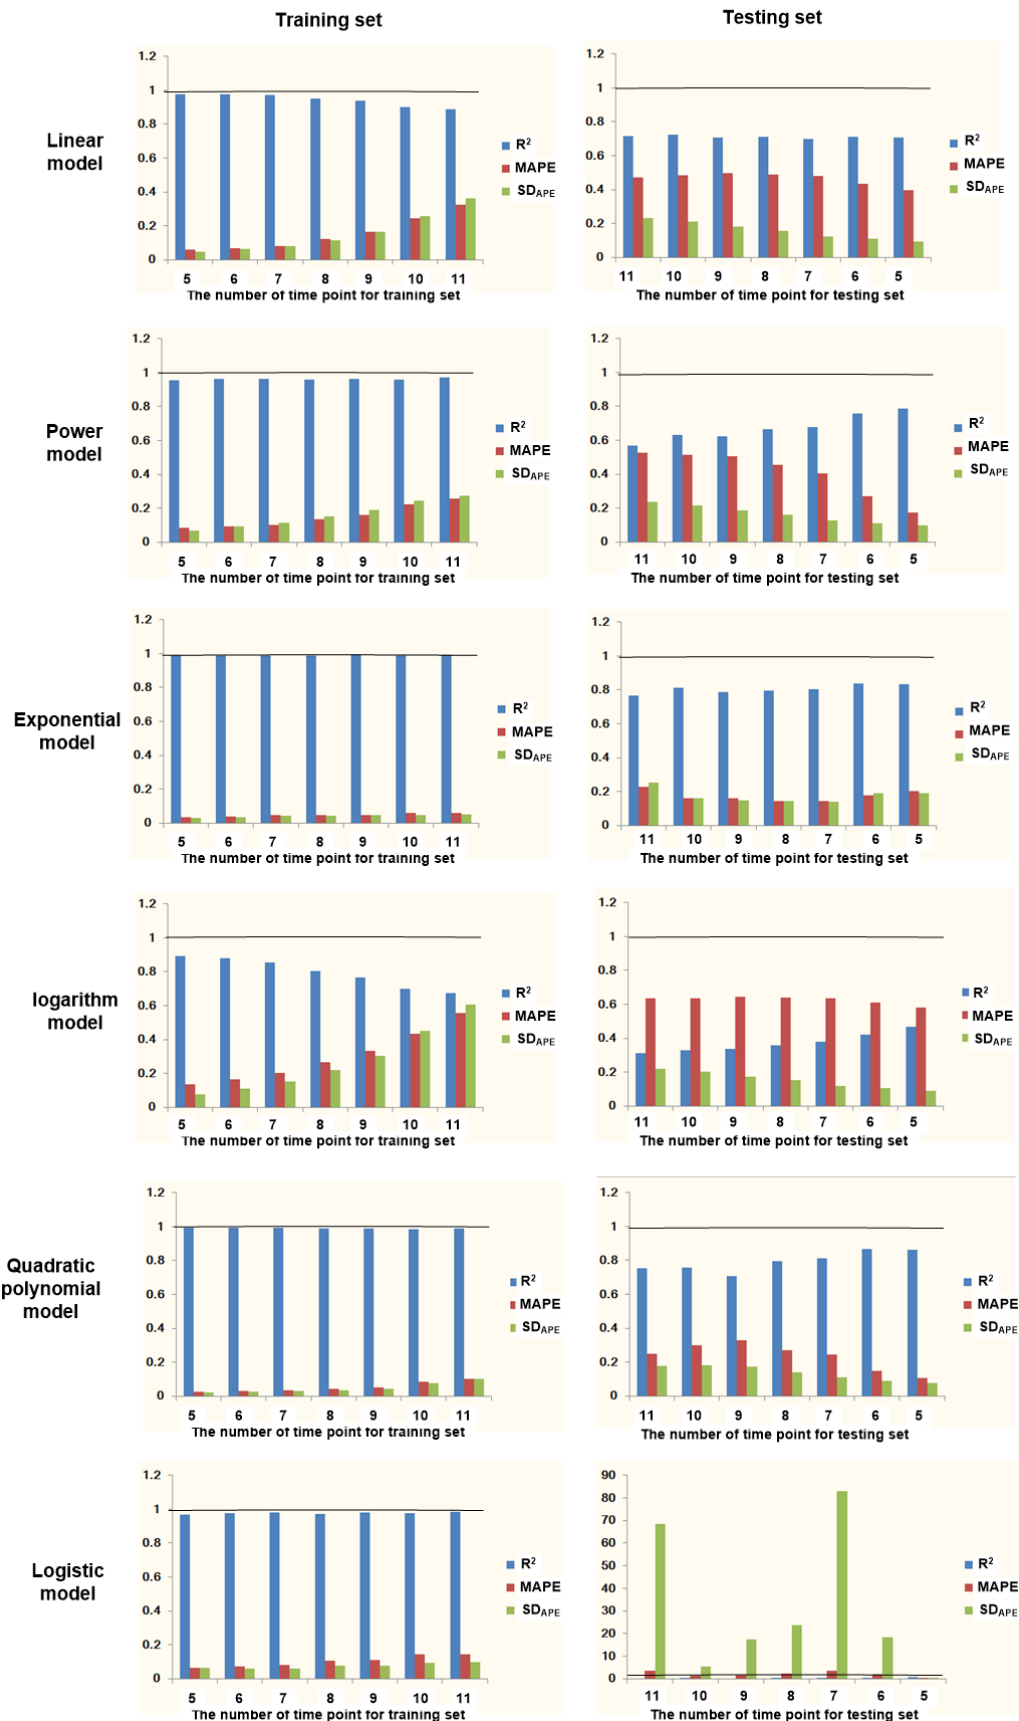

---

123 **Supplementary Figure 6 Predication ability comparison of 6 models for digital**  
124 **biomass accumulation.** The left part indicated the fit quality of 6 models with  
125 training set (including the linear, power, exponential, logarithm, quadratic  
126 polynomial, and logistic model). The right part indicated the fit quality of 6 models  
127 with the corresponding testing set. The total number of time points for modeling was  
128 16, thus if the number of time point for training set was 5 (time points 1-5), the  
129 corresponding number of time point for testing set was 11 (time points 6-16), which  
130 were shown in the x-coordinate in the images. The average  $R^2$ , MAPE, and  $SD_{APE}$   
131 value were indicated. Both in the training set and testing set, the exponential model  
132 presented the best fitted model, which indicated compared with other 5 models, the  
133 exponential model had better predication ability for digital biomass accumulation  
134 during the seedling stage to tasseling stage. The black line indicated the value 1.

135

136

GRMZM2G180490

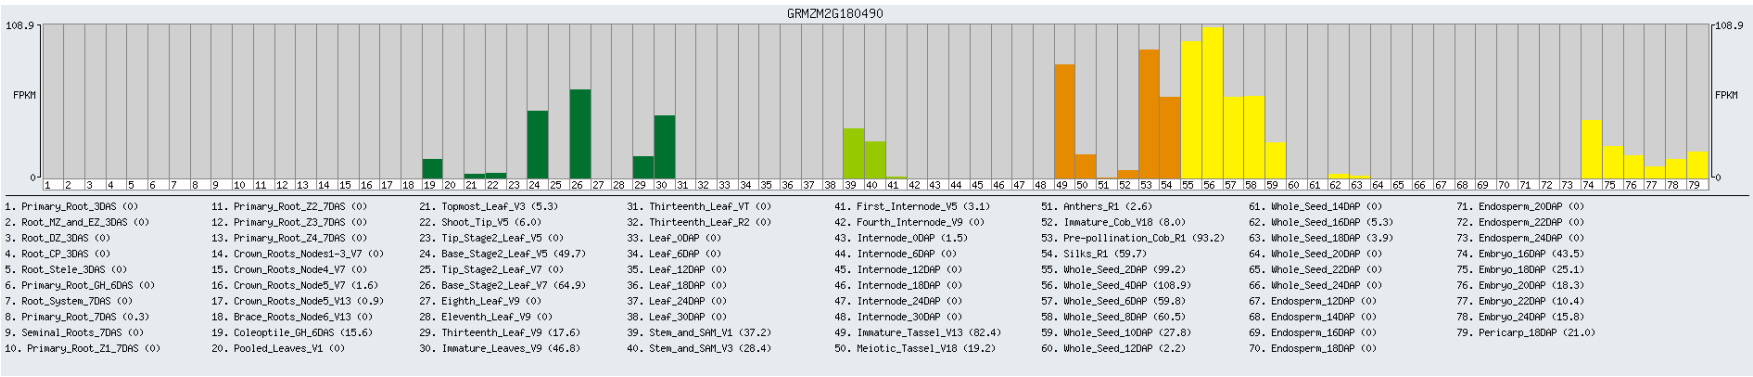

137

138

139

GRMZM2G010702

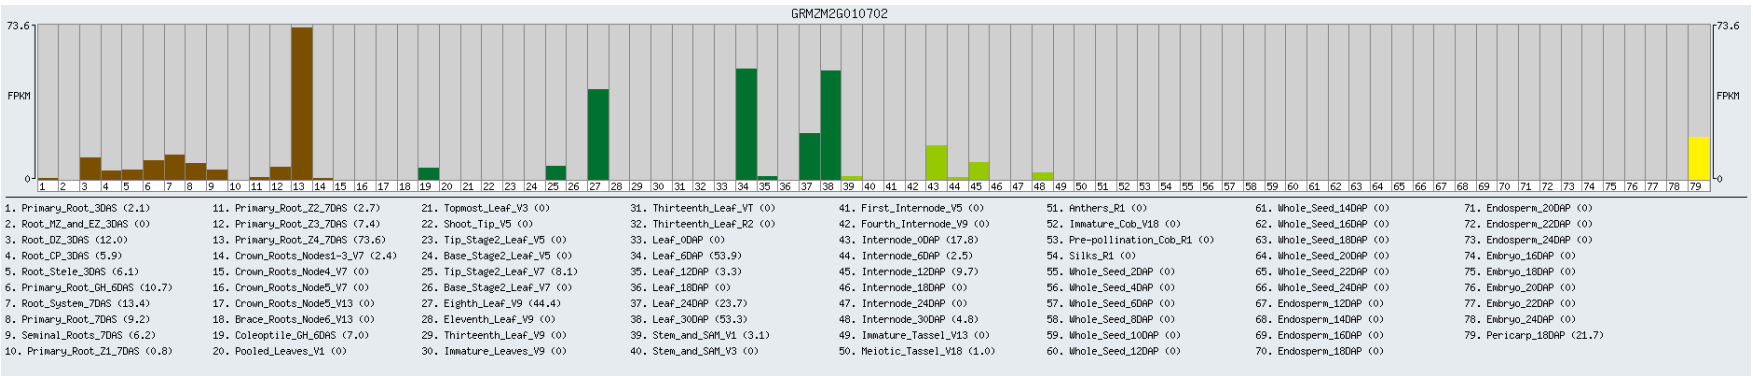

140

141

142 GRMZM2G151649

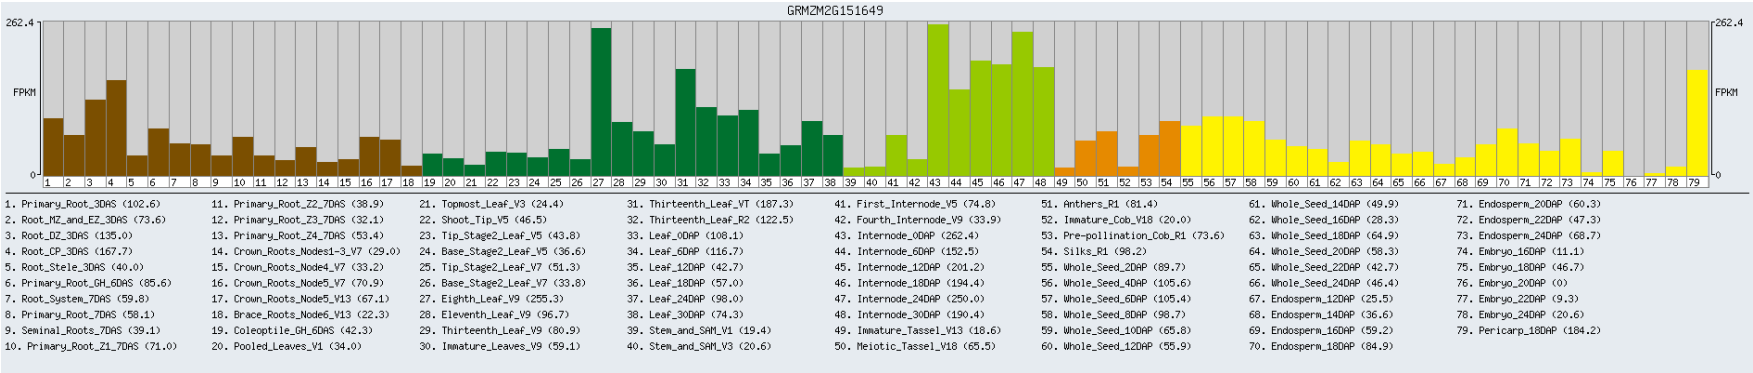

143

144

145 GRMZM2G057023

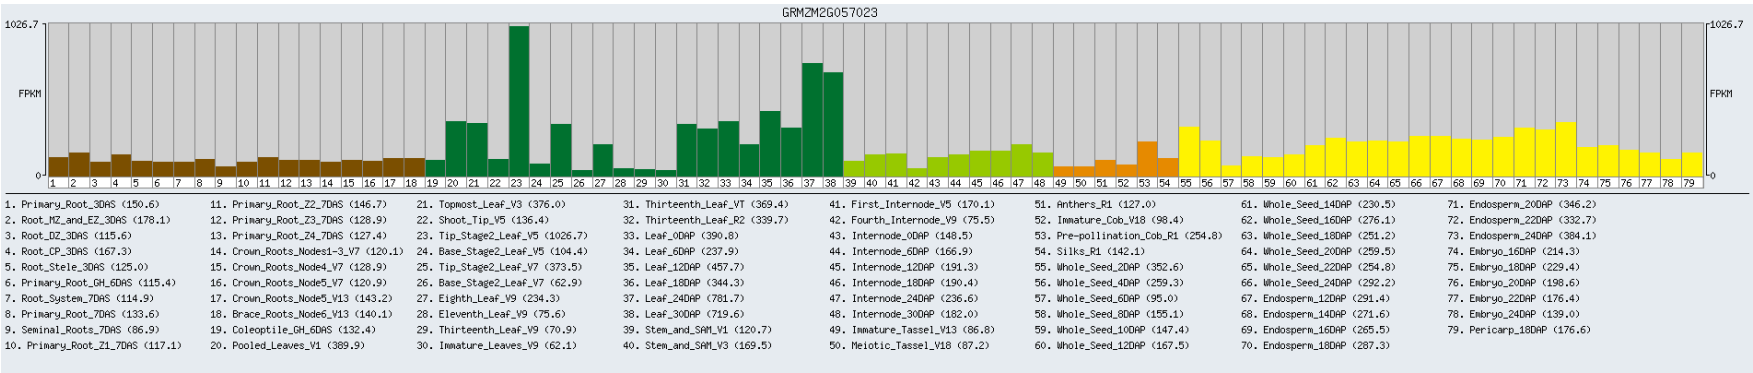

146

---

147 **Supplementary Figure 7** The RNA-seq gene atlas for four genes (GRMZM2G180490, GRMZM2G010702, GRMZM2G151649 and  
148 GRMZM2G057023) of maize inbred B73 includes 79 distinct replicated samples, these four figures from database of maizegdb (ULR:  
149 [http://www.maizegdb.org/gene\\_center/gene/](http://www.maizegdb.org/gene_center/gene/)).

150

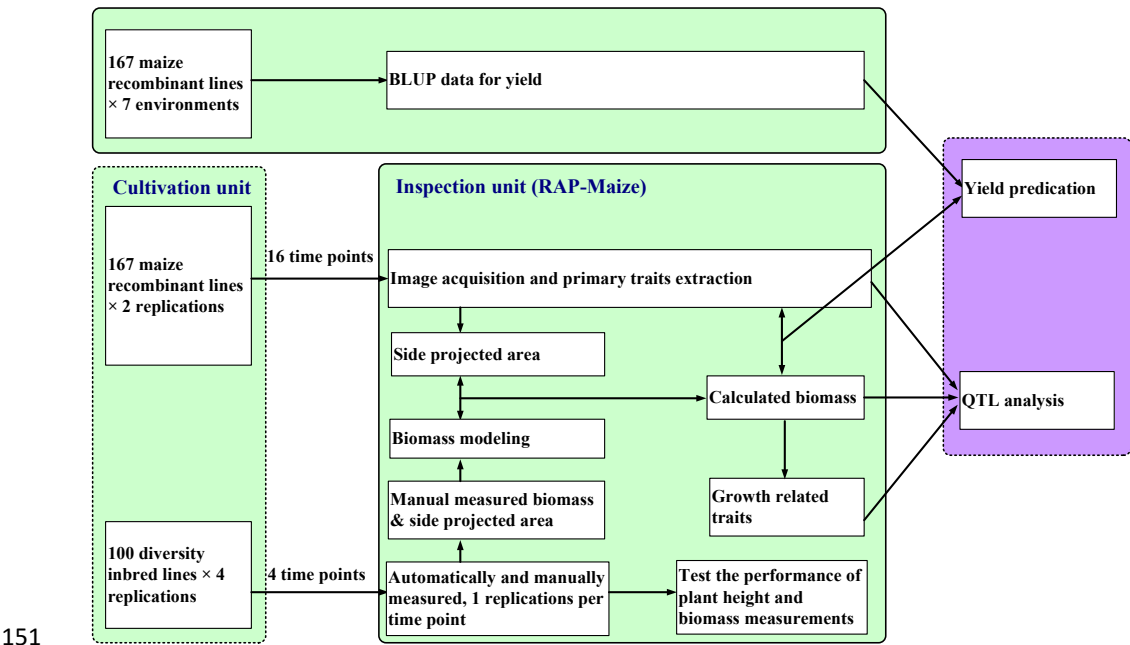

151

152 **Supplementary Figure 8 Experimental design.** A total of 167 maize recombinant  
153 lines with 2 replications were screened every three days (total 16 time points). 100  
154 diversity inbred lines with four replications were screened using RAP and manually  
155 measured. And the BLUP data of yield from the same 167 maize recombinant lines  
156 at 7 environments were used for yield predication.

157

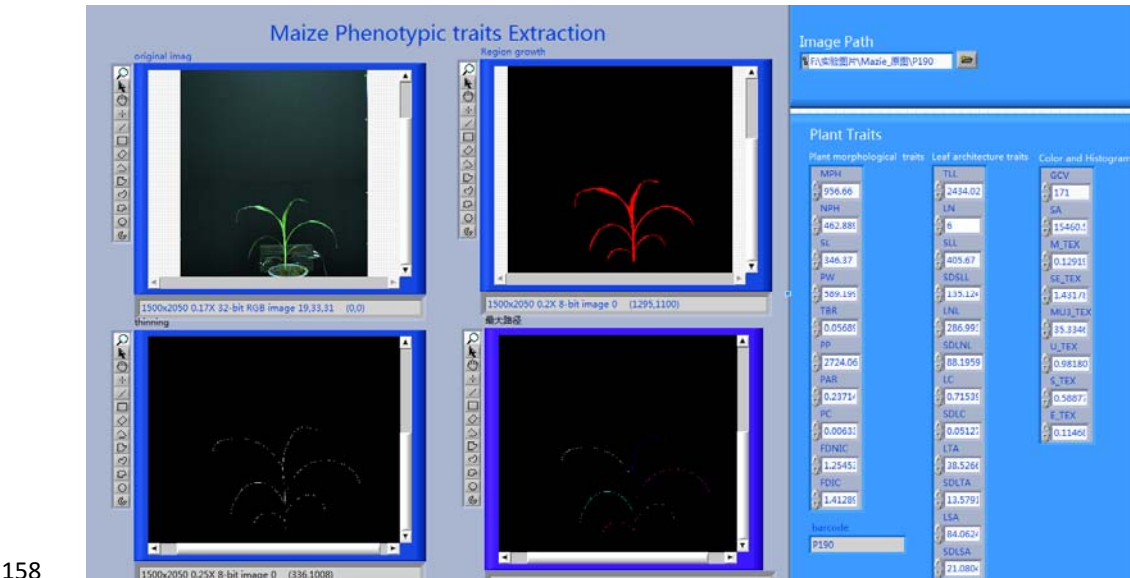

158

159 **Supplementary Figure 9** The image analysis interface designed in the study.

160

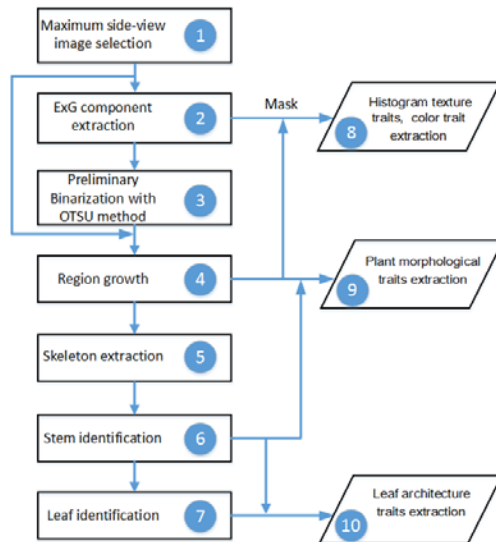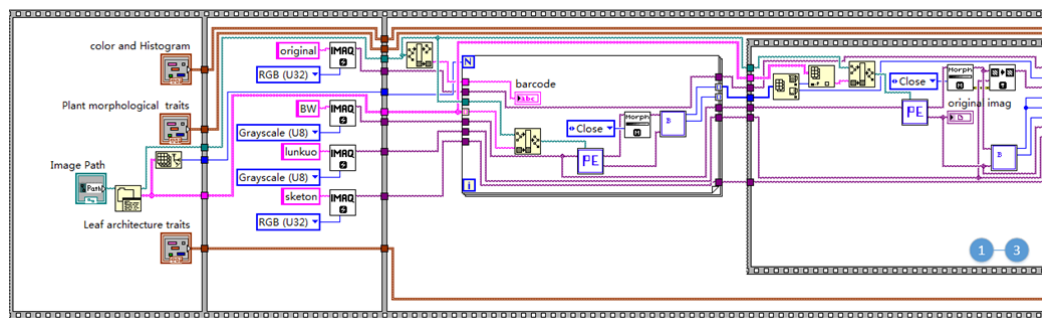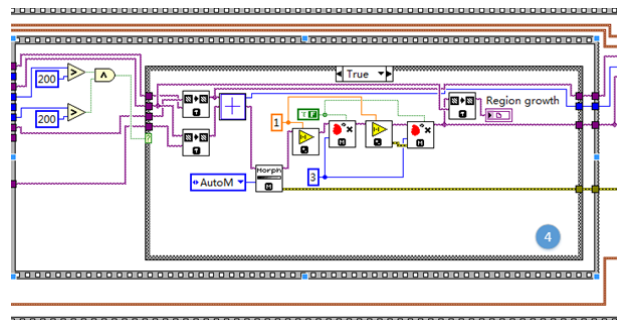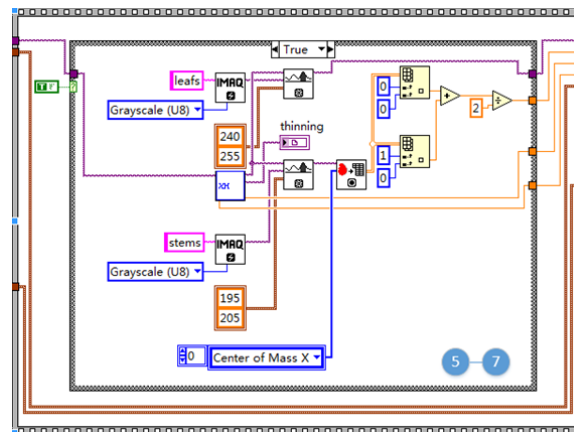

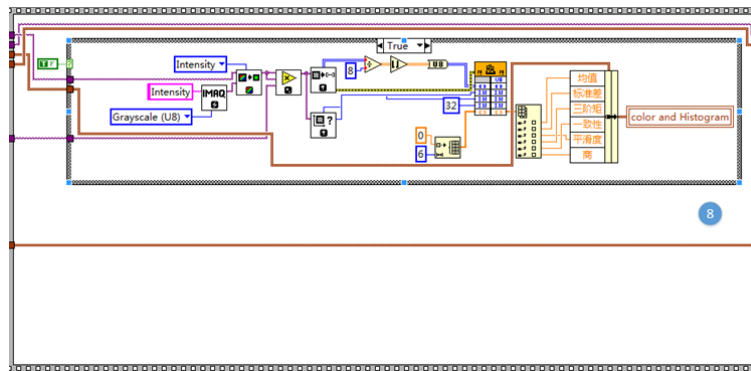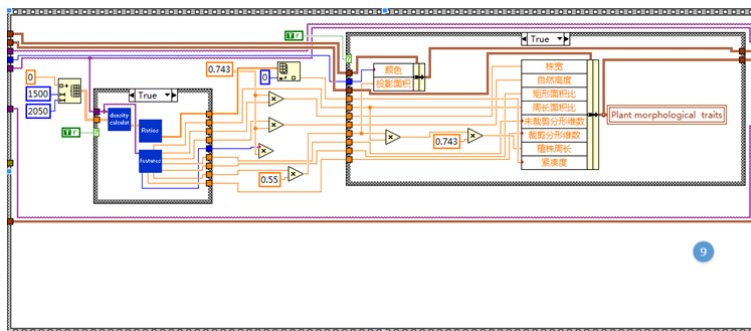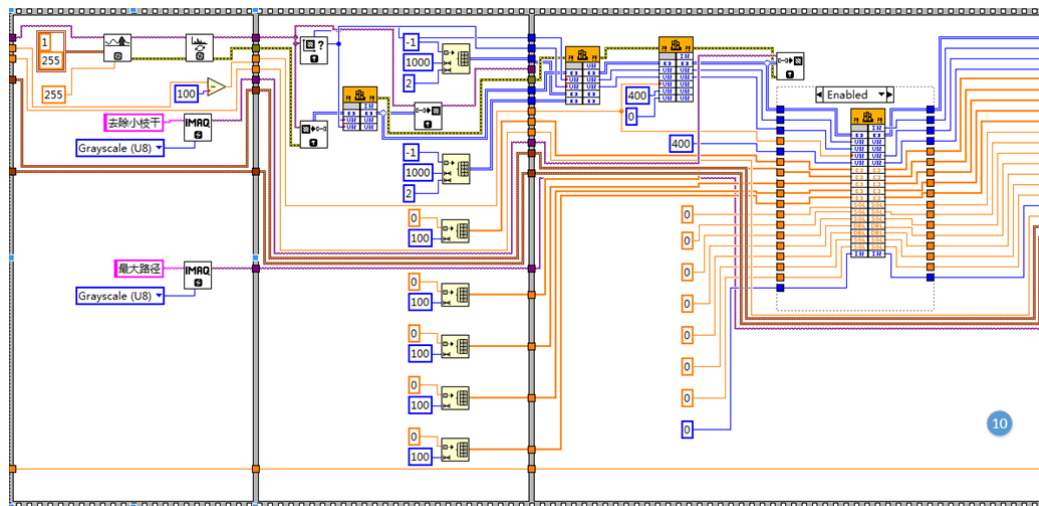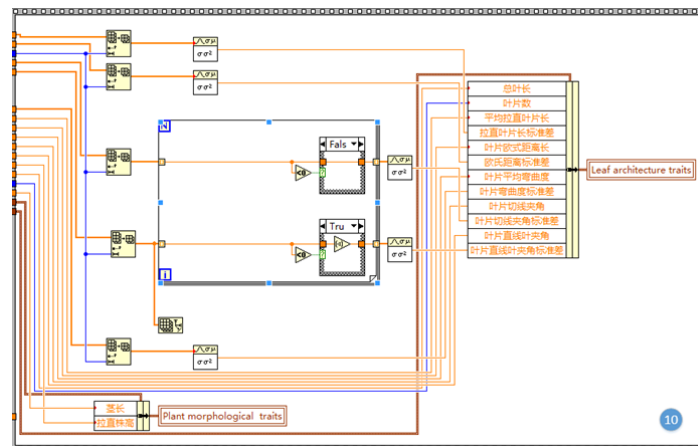

---

170 **Supplementary Figure 10** The flow chart of the program. The number represents  
171 the processing module of the following figure 1~10.  
172

173 **Supplementary Table 1** The 106 traits classification and abbreviation. More details  
174 about the traits extraction can be found in the Supplementary Note 1.

| Trait classification       | Trait                                                                      | Trait abbreviation | Trait definition                  |
|----------------------------|----------------------------------------------------------------------------|--------------------|-----------------------------------|
| Plant morphological traits | Maximum plant height in side view                                          | MPH                | Seen in the Supplementary Note 1. |
|                            | Natural plant height in side view                                          | NPH                |                                   |
|                            | Stem length in side view                                                   | SL                 |                                   |
|                            | Plant width in side view                                                   | PW                 |                                   |
|                            | Total projected area / bounding rectangle area ratio in side view          | TBR                |                                   |
|                            | Plant perimeter in side view                                               | PP                 |                                   |
|                            | Perimeter / projected area ratio in side view                              | PAR                |                                   |
|                            | Plant compactness in side view                                             | PC                 |                                   |
|                            | Fractal dimension without image cropping in side view                      | FDNIC              |                                   |
|                            | Fractal dimension with image cropping in side view                         | FDIC               |                                   |
| Leaf architecture traits   | Total leaf length per plant                                                | TLL                |                                   |
|                            | Leaf number per plant                                                      | LN                 |                                   |
|                            | Average straightened leaf length per plant                                 | SLL                |                                   |
|                            | Standard deviation of straightened leaf length per plant                   | SDSLL              |                                   |
|                            | Average distance between the leaf tip and node per plant                   | LNL                |                                   |
|                            | Standard deviation of the distance between the leaf tip and node per plant | SDLNL              |                                   |
|                            | Average leaf curvature per plant                                           | LC                 |                                   |
|                            | Standard deviation of leaf curvature per plant                             | SDLC               |                                   |
|                            | Average leaf tangency angle per plant                                      | LTA                |                                   |
|                            | Standard deviation of leaf tangency angle per plant                        | SDLTA              |                                   |
|                            | Average leaf straight angle per plant                                      | LSA                |                                   |
|                            | Standard deviation of leaf straight angle per plant                        | SDLSA              |                                   |

---

|                          |                                                                       |                  |              |
|--------------------------|-----------------------------------------------------------------------|------------------|--------------|
|                          | Average straightened leaf length in lower half of plant               | SLL_below        |              |
|                          | Average distance between the leaf tip and node in lower half of plant | LNL_below        |              |
|                          | Average leaf curvature in lower half of plant                         | LC_below         |              |
|                          | Average of leaf tangency angle in lower half of plant                 | LTA_below        |              |
|                          | Average of leaf straight angle in lower half of plant                 | LSA_below        |              |
|                          | Average straightened leaf length in upper half of plant               | SLL_above        |              |
|                          | Average distance between the leaf tip and node in upper half of plant | LNL_above        |              |
|                          | Average leaf curvature in upper half of plant                         | LC_above         |              |
|                          | Average of leaf tangency angle in upper half of plant                 | LTA_above        |              |
|                          | Average of leaf straight angle in upper half of plant                 | LSA_above        |              |
| Color traits             | Green color value in side view                                        | GCV              |              |
| Biomass related traits   | Side projected area                                                   | SA               |              |
|                          | Fresh weight                                                          | FW               |              |
|                          | Dry weight                                                            | DW               |              |
| Histogram texture traits | the mean value                                                        | M_TEX            |              |
|                          | the standard error                                                    | SE_TEX           |              |
|                          | the third moment                                                      | MU3_TEX          |              |
|                          | the uniformity                                                        | U_TEX            |              |
|                          | the smoothness                                                        | S_TEX            |              |
|                          | the entropy                                                           | E_TEX            |              |
| Growth related traits    | Absolute growth rate                                                  | AGR <sub>i</sub> | Calculated   |
|                          |                                                                       | (i=1,...,15)     | using FW and |
|                          | Arithmetic mean value of the 15 absolute growth rates                 | MEAN_AGR         | DW,          |

---

Relative growth rate

$RGR_i$  respectively  
( $i=1,...,15$ )

Arithmetic mean value of the 15 relative growth rates

MEAN\_RGR

---

175

176 **Supplementary Table 2** Statistical summary of the 10 developed models for fresh weight estimation (sample size = 387)\*.

| No. | Model classification | Model                                                    | coefficients                                            | Std. Error              | t                         | Sig.                    | Adjusted R <sup>2</sup> | MAPE   | SD <sub>APE</sub> |
|-----|----------------------|----------------------------------------------------------|---------------------------------------------------------|-------------------------|---------------------------|-------------------------|-------------------------|--------|-------------------|
| 1   | Linear model         | $FW = a_0 + a_1 \times SA_{max}$                         | $a_0 = -6.539$<br>$a_1 = 6.23E-004$                     | 1.211<br>0.000          | -5.399<br>90.840          | 0.000<br>0.000          | 0.955                   | 13.99% | 13.34%            |
| 2   | Linear model         | $FW = a_0 + a_1 \times SA_{ave}$                         | $a_0 = -10.494$<br>$a_1 = 7.80E-004$                    | 1.091<br>0.000          | -9.620<br>103.916         | 0.000<br>0.000          | 0.965                   | 14.28% | 20.34%            |
| 3   | Linear model         | $FW = a_0 + a_1 \times SA_1$                             | $a_0 = -5.786$<br>$a_1 = 7.45E-004$                     | 1.657<br>0.000          | -3.492<br>65.525          | 0.001<br>0.000          | 0.918                   | 21.28% | 17.50%            |
| 4   | Linear model         | $FW = a_0 + a_1 \times TA$                               | $a_0 = 16.536$<br>$a_1 = 2.74E-004$                     | 1.754<br>0.000          | 9.426<br>51.765           | 0.000<br>0.000          | 0.874                   | 54.94% | 75.07%            |
| 5   | Linear model         | $FW = a_0 + a_1 \times SA_{max} + a_2 \times TA$         | $a_0 = -4.042$<br>$a_1 = 5.23E-004$<br>$a_2 = 4.9E-005$ | 1.243<br>0.000<br>0.000 | -3.253<br>28.121<br>5.732 | 0.001<br>0.000<br>0.000 | 0.959                   | 14.98% | 13.48%            |
| 6   | Linear model         | $FW = a_0 + a_1 \times (SA_{max} + SA_{min} + TA)$       | $a_0 = 3.807$<br>$a_1 = 1.65E-004$                      | 1.313<br>0.000          | 2.901<br>77.469           | 0.004<br>0.000          | 0.940                   | 28.16% | 31.88%            |
| 7   | Quadratic model      | $FW = a_0 + a_1 \times SA_{max} + a_2 \times SA_{max}^2$ | $a_0 = -12.909$<br>$a_1 = 7.41E-004$                    | 1.651<br>0.000          | -7.821<br>32.780          | 0.000<br>0.000          | 0.958                   | 16.98% | 26.05%            |

---

|    |             |                                                                 |                           |       |         |       |       |        |        |
|----|-------------|-----------------------------------------------------------------|---------------------------|-------|---------|-------|-------|--------|--------|
|    |             |                                                                 | $a_2 = -3.22\text{E-}010$ | 0.000 | -5.462  | 0.000 |       |        |        |
| 8  | Exponential | $FW = a_0 \times e^{a_1 \times SA_{max}}$                       | $a_0 = 13.176$            | 0.519 | 25.395  | 0.000 | 0.818 | 45.33% | 54.14% |
|    |             |                                                                 | $a_1 = 9.3\text{E-}006$   | 0.000 | 41.725  | 0.000 |       |        |        |
| 9  | Power model | $\ln(FW) = a_0 + a_1 \times \ln(SA_{max})$                      | $a_0 = -10.234$           | 0.103 | -99.594 | 0.000 | 0.980 | 12.31% | 9.97%  |
|    |             |                                                                 | $a_1 = 1.229$             | 0.009 | 137.697 | 0.000 |       |        |        |
| 10 | Power model | $\ln(FW) = a_0 + a_1 \times \ln(SA_{max}) + a_2 \times \ln(TA)$ | $a_0 = -10.081$           | 0.137 | -73.693 | 0.000 | 0.980 | 12.34% | 9.77%  |
|    |             |                                                                 | $a_1 = 1.147$             | 0.049 | 23.191  | 0.000 |       |        |        |
|    |             |                                                                 | $a_2 = 0.067$             | 0.040 | 1.680   | 0.094 |       |        |        |

---

177 \*FW is fresh weight.  $SA_{max}$ ,  $SA_{min}$ ,  $SA_{ave}$ ,  $SA_l$  are the maximum projected area among 15 side view images, minimum projected area among 15  
178 side view images, average projected area among 15 side view images, the first image among 15 side view images, respectively.  $TA$  is projected  
179 area in top view.

180

**Supplementary Table 3** Statistical summary of the 10 developed models for dry weight estimation (sample size = 387)\*.

| No. | Model classification | Model                                                    | coefficients                                           | Std. Error              | t                         | Sig.                    | Adjusted R <sup>2</sup> | MAPE   | SD <sub>APE</sub> |
|-----|----------------------|----------------------------------------------------------|--------------------------------------------------------|-------------------------|---------------------------|-------------------------|-------------------------|--------|-------------------|
| 1   | Linear model         | $DW = a_0 + a_1 \times SA_{max}$                         | $a_0 = -1.235$<br>$a_1 = 6.7E-005$                     | 0.163<br>0.000          | -7.561<br>72.341          | 0.000<br>0.000          | 0.931                   | 20.22% | 29.99%            |
| 2   | Linear model         | $DW = a_0 + a_1 \times SA_{ave}$                         | $a_0 = -1.175$<br>$a_1 = 8.1E-005$                     | 0.171<br>0.000          | -9.321<br>70.737          | 0.000<br>0.000          | 0.928                   | 24.89% | 42.37%            |
| 3   | Linear model         | $DW = a_0 + a_1 \times SA_1$                             | $a_0 = -1.109$<br>$a_1 = 8.0E-005$                     | 0.212<br>0.000          | -5.220<br>54.655          | 0.000<br>0.000          | 0.886                   | 22.06% | 25.80%            |
| 4   | Linear model         | $DW = a_0 + a_1 \times TA$                               | $a_0 = 1.158$<br>$a_1 = 3.0E-005$                      | 0.191<br>0.000          | 6.058<br>51.703           | 0.000<br>0.000          | 0.874                   | 49.76% | 70.17%            |
| 5   | Linear model         | $DW = a_0 + a_1 \times SA_{max} + a_2 \times TA$         | $a_0 = -0.816$<br>$a_1 = 5.0E-005$<br>$a_2 = 8.3E-006$ | 0.164<br>0.000<br>0.000 | -4.988<br>20.480<br>7.304 | 0.000<br>0.000<br>0.000 | 0.940                   | 16.87% | 19.59%            |
| 6   | Linear model         | $DW = a_0 + a_1 \times (SA_{max} + SA_{min} + TA)$       | $a_0 = -0.176$<br>$a_1 = 1.8E-005$                     | 0.156<br>0.000          | -1.130<br>70.421          | 0.259<br>0.000          | 0.928                   | 21.52% | 21.97%            |
| 7   | Quadratic model      | $DW = a_0 + a_1 \times SA_{max} + a_2 \times SA_{max}^2$ | $a_0 = -0.781$<br>$a_1 = 5.9E-005$                     | 0.229<br>0.000          | -3.411<br>18.667          | 0.001<br>0.000          | 0.933                   | 16.59% | 18.22%            |

---

|    |                   |                                                                 |                         |       |          |       |       |        |        |
|----|-------------------|-----------------------------------------------------------------|-------------------------|-------|----------|-------|-------|--------|--------|
|    |                   |                                                                 | $a_2 = 2.3\text{E-}011$ | 0.000 | 2.812    | 0.005 |       |        |        |
| 8  | Exponential model | $DW = a_0 \times e^{a_1 \times SA_{max}}$                       | $a_0 = 1.211$           | 0.049 | 24.564   | 0.000 | 0.820 | 48.15% | 57.91% |
|    |                   |                                                                 | $a_1 = 9.7\text{E-}006$ | 0.000 | 41.960   | 0.000 |       |        |        |
| 9  | Power model       | $\ln(DW) = a_0 + a_1 \times \ln(SA_{max})$                      | $a_0 = -13.047$         | 0.128 | -101.593 | 0.000 | 0.971 | 15.85% | 13.73% |
|    |                   |                                                                 | $a_1 = 1.270$           | 0.011 | 113.906  | 0.000 |       |        |        |
| 10 | Power model       | $\ln(DW) = a_0 + a_1 \times \ln(SA_{max}) + a_2 \times \ln(TA)$ | $a_0 = -12.937$         | 0.171 | -75.482  | 0.000 | 0.971 | 15.83% | 13.73% |
|    |                   |                                                                 | $a_1 = 1.211$           | 0.062 | 19.551   | 0.000 |       |        |        |
|    |                   |                                                                 | $a_2 = 0.048$           | 0.050 | 0.966    | 0.335 |       |        |        |

---

182 \* $DW$  is dry weight.  $SA_{max}$ ,  $SA_{min}$ ,  $SA_{ave}$ ,  $SA_I$  are the maximum projected area among 15 side view images, minimum projected area among 15  
183 side view images, average projected area among 15 side view images, the single image with an angle of  $0^\circ$ , respectively.  $TA$  is projected area in  
184 top view.

185 **Supplementary Table 4 Summary of QTL for Growth Rate Related Trait Identified at Sixteen Time Points.**

| Trait  | No. of Time Points <sup>a</sup> | No. of QTLs (Mean and Range) | PVE (% Mean and Range) <sup>b</sup> | No. of QTLs |
|--------|---------------------------------|------------------------------|-------------------------------------|-------------|
| AGR_DW | 8 (16)                          | 1.5 (1-3)                    | 10.0 (7.9-15.7)                     | 12          |
| RGR_DW | 5 (16)                          | 1.8 (1-3)                    | 8.8 (7.5-10.0)                      | 9           |
| AGR_FW | 9 (16)                          | 1.8 (1-3)                    | 10.0 (7.9-17.8)                     | 16          |
| RGR_FW | 7 (16)                          | 1.9 (1-4)                    | 8.4 (7.3-10.2)                      | 13          |

186 <sup>a</sup> Number of time points that have QTLs identified in this study; the total number of time points identified for each trait is in parentheses. <sup>b</sup>

187 Phenotypic variation explained (PVE) by each QTL.

188

189

190 **Supplementary Table 5** Statistical summary of the 6 developed models for digital biomass accumulation (167 samples  $\times$  16 time points).

| Model        | Model solution        | Training set |       |       |       | Testing set |       |       |       |
|--------------|-----------------------|--------------|-------|-------|-------|-------------|-------|-------|-------|
|              |                       | Number of    |       |       | $R^2$ | Number of   |       |       | $R^2$ |
|              |                       | time points  |       |       |       | time points |       |       |       |
| Linear model | $DB = b + a \times t$ | 5            | 0.975 | 6.2%  | 4.9%  | 11          | 0.716 | 47.3% | 23.1% |
|              |                       | 6            | 0.977 | 6.9%  | 6.3%  | 10          | 0.726 | 48.3% | 21.1% |
|              |                       | 7            | 0.973 | 8.2%  | 7.9%  | 9           | 0.707 | 49.7% | 18.2% |
|              |                       | 8            | 0.951 | 12.2% | 11.5% | 8           | 0.711 | 48.7% | 15.7% |
|              |                       | 9            | 0.938 | 16.5% | 16.3% | 7           | 0.699 | 47.9% | 12.4% |
|              |                       | 10           | 0.9   | 24.4% | 25.8% | 6           | 0.711 | 43.6% | 10.9% |
|              |                       | 11           | 0.889 | 32.6% | 36.1% | 5           | 0.709 | 39.7% | 9.4%  |
| Power model  | $DB = at^b$           | 5            | 0.957 | 8.6%  | 7%    | 11          | 0.568 | 52.8% | 23.6% |
|              |                       | 6            | 0.964 | 9.2%  | 9.3%  | 10          | 0.63  | 51.4% | 21.6% |
|              |                       | 7            | 0.966 | 10.2% | 11.4% | 9           | 0.623 | 50.5% | 18.6% |
|              |                       | 8            | 0.958 | 13.4% | 15.4% | 8           | 0.665 | 45.4% | 16%   |
|              |                       | 9            | 0.963 | 16.1% | 19.2% | 7           | 0.678 | 40.3% | 12.8% |

---

|                      |                  |    |       |       |       |    |       |       |       |
|----------------------|------------------|----|-------|-------|-------|----|-------|-------|-------|
|                      |                  | 10 | 0.959 | 22.6% | 24.3% | 6  | 0.758 | 27%   | 11.1% |
|                      |                  | 11 | 0.971 | 25.7% | 27.4% | 5  | 0.789 | 17.3% | 9.8%  |
| Exponential<br>model | $DB = ae^{bt}$   | 5  | 0.989 | 3.5%  | 2.9%  | 11 | 0.767 | 22.7% | 25.2% |
|                      |                  | 6  | 0.989 | 4%    | 3.4%  | 10 | 0.814 | 15.9% | 16.2% |
|                      |                  | 7  | 0.989 | 4.8%  | 4.3%  | 9  | 0.788 | 16%   | 14.7% |
|                      |                  | 8  | 0.99  | 4.9%  | 4.3%  | 8  | 0.797 | 14.5% | 14.4% |
|                      |                  | 9  | 0.993 | 4.9%  | 4.6%  | 7  | 0.803 | 14.6% | 13.8% |
|                      |                  | 10 | 0.991 | 5.9%  | 4.7%  | 6  | 0.838 | 17.8% | 19.2% |
|                      |                  | 11 | 0.994 | 5.8%  | 5%    | 5  | 0.834 | 20.3% | 18.9% |
| Logarithm<br>model   | $DB = a \ln(bt)$ | 5  | 0.893 | 13.5% | 7.5%  | 11 | 0.314 | 63.5% | 22.1% |
|                      |                  | 6  | 0.878 | 16.6% | 11.2% | 10 | 0.331 | 63.8% | 20.2% |
|                      |                  | 7  | 0.856 | 20.4% | 15.1% | 9  | 0.336 | 64.6% | 17.3% |
|                      |                  | 8  | 0.803 | 26.5% | 21.9% | 8  | 0.359 | 64.1% | 15.1% |
|                      |                  | 9  | 0.766 | 33.5% | 30.4% | 7  | 0.381 | 63.6% | 12%   |
|                      |                  | 10 | 0.701 | 43.3% | 45.2% | 6  | 0.422 | 60.9% | 10.5% |

---

|                    |                                                      |    |       |       |       |    |       |        |         |
|--------------------|------------------------------------------------------|----|-------|-------|-------|----|-------|--------|---------|
|                    |                                                      | 11 | 0.672 | 55.4% | 60.7% | 5  | 0.467 | 58.1%  | 8.9%    |
| Quadratic<br>model | $DB = at^2 + bt + c$                                 | 5  | 0.992 | 2.7%  | 2.4%  | 11 | 0.753 | 25%    | 17.9%   |
|                    |                                                      | 6  | 0.994 | 3%    | 2.7%  | 10 | 0.759 | 30%    | 18.1%   |
|                    |                                                      | 7  | 0.994 | 3.4%  | 3%    | 9  | 0.709 | 33.1%  | 17.4%   |
|                    |                                                      | 8  | 0.99  | 4.4%  | 3.6%  | 8  | 0.794 | 27%    | 13.9%   |
|                    |                                                      | 9  | 0.991 | 5%    | 4.4%  | 7  | 0.811 | 24.7%  | 11.2%   |
|                    |                                                      | 10 | 0.985 | 8.6%  | 7.6%  | 6  | 0.868 | 14.7%  | 8.8%    |
|                    |                                                      | 11 | 0.988 | 10.2% | 10.4% | 5  | 0.861 | 10.8%  | 7.6%    |
| Logistic<br>model  | $DB = \frac{y_m}{1 + (\frac{y_m}{y(1)} - 1)e^{-rt}}$ | 5  | 0.968 | 6.6%  | 6.4%  | 11 | 0     | 354.8% | 6837.8% |
|                    |                                                      | 6  | 0.976 | 7.1%  | 6.2%  | 10 | 0.001 | 119.5% | 552.6%  |
|                    |                                                      | 7  | 0.98  | 7.9%  | 6.1%  | 9  | 0     | 160%   | 1732.4% |
|                    |                                                      | 8  | 0.973 | 10.6% | 7.7%  | 8  | 0.006 | 218.1% | 2381%   |
|                    |                                                      | 9  | 0.98  | 11.2% | 7.8%  | 7  | 0.001 | 369.4% | 8291.9% |
|                    |                                                      | 10 | 0.978 | 14.5% | 9.4%  | 6  | 0.002 | 208%   | 1836%   |
|                    |                                                      | 11 | 0.983 | 14.2% | 9.6%  | 5  | 0.568 | 23%    | 36.2%   |

---

---

191 \*total 167 samples with 16 time points were used, and the dry weight values in 16 time points were divided into two parts: training set and  
192 testing set.  $DB$  is the digital biomass;  $t$  is the time point;  $y_m$  is the saturation level of digital biomass;  $y(1)$  is the digital biomass at the first time  
193 point;  $r$  is intrinsic growth rate; other variables are constants.

194

195

196 **Supplementary Table 6** Detecting the phenotypic traits (not include growth related  
197 traits) significantly associated with yield (Tons per hectare) and calculating the  
198 percentage of the phenotypic variance explanation ( $R^2$ ).

| The number of<br>time points | No. of the time<br>points | Sample<br>size | The number of<br>predictors | $R^2$ |
|------------------------------|---------------------------|----------------|-----------------------------|-------|
| 1                            | 1                         | 167            | 2                           | 0.097 |
|                              | 2                         | 167            | 2                           | 0.054 |
|                              | 3                         | 167            | 3                           | 0.085 |
|                              | 4                         | 167            | 0                           | 0     |
|                              | 5                         | 167            | 4                           | 0.109 |
|                              | 6                         | 167            | 0                           | 0     |
|                              | 7                         | 167            | 1                           | 0.026 |
|                              | 8                         | 167            | 2                           | 0.063 |
|                              | 9                         | 167            | 3                           | 0.091 |
|                              | 10                        | 167            | 0                           | 0     |
|                              | 11                        | 167            | 1                           | 0.057 |
|                              | 12                        | 167            | 1                           | 0.031 |
|                              | 13                        | 167            | 2                           | 0.061 |
|                              | 14                        | 167            | 3                           | 0.100 |
|                              | 15                        | 167            | 2                           | 0.064 |
|                              | 16                        | 167            | 1                           | 0.045 |
| 2*                           | 5, 14                     | 167            | 4                           | 0.140 |
|                              | 5, 13                     | 167            | 4                           | 0.137 |
|                              | 2, 10                     | 167            | 3                           | 0.090 |
|                              | 8, 16                     | 167            | 2                           | 0.084 |
|                              | 7, 15                     | 167            | 3                           | 0.092 |
|                              | 4, 12                     | 167            | 1                           | 0.031 |
|                              | 3, 11                     | 167            | 1                           | 0.057 |

---

|     |              |     |    |       |
|-----|--------------|-----|----|-------|
|     | 4, 12        | 167 | 1  | 0.031 |
|     | 1, 8         | 167 | 2  | 0.108 |
|     | 5, 9         | 167 | 3  | 0.090 |
| 4*  | 1, 8, 9, 14  | 167 | 7  | 0.259 |
|     | 3, 7, 11, 15 | 167 | 1  | 0.060 |
|     | 4, 8, 12, 16 | 167 | 2  | 0.084 |
|     | 2, 6, 10, 14 | 167 | 7  | 0.236 |
|     | 1, 5, 8, 12  | 167 | 5  | 0.197 |
|     | 4, 9, 12, 16 | 167 | 9  | 0.293 |
|     | 1, 5, 9, 13  | 167 | 6  | 0.250 |
|     | 4, 8, 12, 16 | 167 | 2  | 0.084 |
|     | 1, 8, 9, 15  | 167 | 7  | 0.255 |
|     | 1, 8, 9, 16  | 167 | 8  | 0.296 |
| 16* | 1~16         | 167 | 16 | 0.546 |

---

199 \*The number of time points was 2: (1) first divided the traits in 1-16 time points into  
200 2 parts: 1-8 time points, and 9-16 time points; (2) then randomly selected one time  
201 point from each part; (3) analyzing the phenotypic traits of 2 time points significantly  
202 associated with yield using linear stepwise regression.

203 \*The number of time points was 4: (1) first divided the traits in 1-16 time points into  
204 4 parts: 1-4, 5-8, 9-12, and 13-16 time points; (2) then randomly selected one time  
205 point from each part; (3) analyzing the phenotypic traits of 4 time points significantly  
206 associated with yield using linear stepwise regression.

207 \*The number of time points was 16: (1) analyzing the phenotypic traits of whole 16  
208 time points significantly associated with yield using linear stepwise regression; (2)  
209 when the selected traits number was 16, the phenotypic variance explanation ( $R^2$ ) was  
210 0.546.

211 **Supplementary Table 7** The statistical details of coefficients in selected model for yield (time points: 1, 8, 9, 16 in the Supplementary Table 6).

| Variable     | Unstandardized coefficients |             | Standardized coefficients |              | Sig.        | Correlation coefficient |
|--------------|-----------------------------|-------------|---------------------------|--------------|-------------|-------------------------|
|              | Beta                        | Std. Error  | Beta                      | t            |             |                         |
| (Constant)   | -5.958631315                | 1.545129291 | -                         | -3.856396581 | 0.000170319 | -                       |
| FDIC_1       | 4.074374336                 | 0.871183001 | 0.325337978               | 4.676829473  | 6.44704E-06 | 0.26126088              |
| LTA_above_1  | 0.015439375                 | 0.00718035  | 0.146492247               | 2.150225976  | 0.033139983 | 0.13366803              |
| GCV_8        | 0.011257982                 | 0.003785316 | 0.205465432               | 2.974119177  | 0.003425104 | 0.11361801              |
| SDLC_8       | 3.915590568                 | 1.201529835 | 0.247415027               | 3.25883757   | 0.001384015 | 0.17101926              |
| LTA_above_9  | -0.027602628                | 0.008084923 | -0.241236636              | -3.414086825 | 0.000823206 | -0.1517652              |
| LTA_below_9  | 0.023143027                 | 0.005221208 | 0.337257196               | 4.43250423   | 1.78875E-05 | 0.15576905              |
| LNL_above_16 | 0.000992047                 | 0.000439417 | 0.157834234               | 2.257643508  | 0.025411289 | 0.19162319              |
| LSA_below_16 | -0.007914713                | 0.002375563 | -0.251159956              | -3.331721454 | 0.001086861 | -0.0498452              |

212

213

214 **Supplementary Table 8** Candidate genes and their annotations located in the first three peak bins in QTL hot spot located on chromosome 10.

| Bin                                                     | LOD   | Candidate<br>gene | Gene_start<br>(bp) | Gene_end<br>(bp) | Gene_length<br>(bp) | Annotation                                         |
|---------------------------------------------------------|-------|-------------------|--------------------|------------------|---------------------|----------------------------------------------------|
| Left bin<br>(51.11-51.41<br>cM or<br>90.93-91.96<br>Mb) | 7.338 | GRMZM5G807276     | 90929578           | 90933166         | 3588                | Flavonol synthase-like protein                     |
|                                                         | 7.338 | GRMZM2G089721     | 91086013           | 91087416         | 1403                | C2H2 zinc finger protein                           |
|                                                         | 7.338 | GRMZM2G306237     | 91132646           | 91134810         | 2164                | unknown                                            |
|                                                         | 7.338 | GRMZM2G039381     | 91170189           | 91171172         | 983                 | plantacyanin                                       |
|                                                         | 7.338 | GRMZM2G329559     | 91356652           | 91359020         | 2368                | unknown                                            |
|                                                         | 7.338 | GRMZM2G038846     | 91359222           | 91360805         | 1583                | Pathogenesis-related thaumatin superfamily protein |
|                                                         | 7.338 | GRMZM2G042164     | 91480073           | 91501698         | 21625               | serine-type peptidase activity                     |
|                                                         | 7.338 | GRMZM2G424651     | 91585407           | 91595431         | 10024               | unknown                                            |
|                                                         | 7.338 | GRMZM2G140448     | 91679345           | 91681251         | 1906                | electron carrier activity                          |
|                                                         | 7.338 | GRMZM2G116626     | 91713408           | 91720273         | 6865                | galactosylceramidase activity                      |
|                                                         | 7.338 | GRMZM2G116704     | 91729914           | 91730391         | 477                 | unknown                                            |
|                                                         | 7.338 | AC188000.3_FG003  | 91778426           | 91779253         | 827                 | unknown                                            |
|                                                         | 7.338 | GRMZM2G347623     | 91780983           | 91788482         | 7499                | unknown                                            |
|                                                         | 7.338 | GRMZM2G419826     | 91858268           | 91858624         | 356                 | unknown                                            |
|                                                         | 7.338 | GRMZM2G158141     | 91956237           | 91959657         | 3420                | unknown                                            |
| Peak bin<br>(51.41-51.71<br>cM or<br>91.96-94.97<br>Mb) | 9.761 | GRMZM2G176998     | 92132744           | 92135362         | 2618                | unknown                                            |
|                                                         | 9.761 | GRMZM2G582586     | 92305272           | 92305758         | 486                 | unknown                                            |
|                                                         | 9.761 | GRMZM2G110567     | 92536953           | 92538977         | 2024                | unknown                                            |
|                                                         | 9.761 | GRMZM5G871827     | 92543634           | 92544361         | 727                 | unknown                                            |
|                                                         | 9.761 | GRMZM2G549348     | 92543634           | 92544237         | 603                 | unknown                                            |
|                                                         | 9.761 | GRMZM2G149698     | 92780255           | 92795025         | 14770               | zinc ion binding                                   |

---

|       |                  |          |          |      |                                           |
|-------|------------------|----------|----------|------|-------------------------------------------|
| 9.761 | GRMZM2G025939    | 92823290 | 92831359 | 8069 | sodium:dicarboxylate symporter activity   |
| 9.761 | GRMZM2G174699    | 92909267 | 92914756 | 5489 | hydrolase activity                        |
| 9.761 | GRMZM2G343291    | 93139717 | 93141352 | 1635 | unknown                                   |
| 9.761 | AC199571.3_FG004 | 93222605 | 93224374 | 1769 | cell redox homeostasis                    |
| 9.761 | AC199571.3_FG003 | 93224472 | 93226100 | 1628 | unknown                                   |
| 9.761 | AC199571.3_FG001 | 93228585 | 93232585 | 4000 | unknown                                   |
| 9.761 | GRMZM2G450512    | 93377121 | 93377751 | 630  | unknown                                   |
| 9.761 | GRMZM2G061879    | 93396308 | 93397659 | 1351 | cysteine-type endopeptidase activity      |
| 9.761 | GRMZM2G018099    | 93439404 | 93439793 | 389  | unknown                                   |
| 9.761 | GRMZM2G048697    | 93634149 | 93634637 | 488  | unknown                                   |
| 9.761 | GRMZM5G833699    | 93684085 | 93687059 | 2974 | ATP binding                               |
| 9.761 | GRMZM2G701389    | 93823514 | 93824012 | 498  | unknown                                   |
| 9.761 | GRMZM5G863097    | 93909832 | 93913928 | 4096 | cation transmembrane transporter activity |
| 9.761 | GRMZM5G831308    | 93917114 | 93918884 | 1770 | hydrolase activity                        |
| 9.761 | GRMZM5G818631    | 93924872 | 93926095 | 1223 | unknown                                   |
| 9.761 | GRMZM2G066044    | 94000687 | 94003652 | 2965 | DNA binding                               |
| 9.761 | GRMZM2G701394    | 94035799 | 94036372 | 573  | unknown                                   |
| 9.761 | GRMZM2G006871    | 94053195 | 94054568 | 1373 | unknown                                   |
| 9.761 | GRMZM2G166899    | 94069900 | 94071281 | 1381 | cofactor binding                          |
| 9.761 | GRMZM2G174773    | 94088449 | 94092547 | 4098 | cation transmembrane transporter activity |
| 9.761 | GRMZM2G174671    | 94095402 | 94103354 | 7952 | hydrolase activity                        |
| 9.761 | GRMZM2G381691    | 94248710 | 94251264 | 2554 | unknown                                   |
| 9.761 | GRMZM2G077951    | 94589221 | 94591581 | 2360 | unknown                                   |
| 9.761 | GRMZM2G176737    | 94700361 | 94702957 | 2596 | unknown                                   |
| 9.761 | GRMZM2G079944    | 94725452 | 94728221 | 2769 | shikimate kinase activity                 |

---

---

|              |       |                  |          |          |      |             |
|--------------|-------|------------------|----------|----------|------|-------------|
|              | 9.761 | GRMZM2G034807    | 94878301 | 94879200 | 899  | unknown     |
|              | 9.761 | GRMZM2G011928    | 94898386 | 94900563 | 2177 | unknown     |
|              | 9.761 | AC208625.3_FG004 | 94943457 | 94944123 | 666  | unknown     |
|              | 9.761 | GRMZM2G142680    | 94965435 | 94969104 | 3669 | ATP binding |
| Right bin    | 5.915 | GRMZM2G171716    | 95041622 | 95043310 | 1688 | unknown     |
| (51.71-52.31 | 5.915 | GRMZM2G401883    | 95076585 | 95077348 | 763  | unknown     |
| cM or        |       |                  |          |          |      |             |
| 94.97-95.21  | 5.915 | GRMZM2G131611    | 95122698 | 95125994 | 3296 | unknown     |
| Mb)          |       |                  |          |          |      |             |

---

216 **Supplementary Table 9** Candidate genes and their annotations located in the first three peak bins in QTL hot spot located on chromosome 7.

| Bin                                                 | LOD   | Candidate gene | Gene_start (bp) | Gene_end (bp) | Gene_length (bp) | Annotation                                  |
|-----------------------------------------------------|-------|----------------|-----------------|---------------|------------------|---------------------------------------------|
| Left bin<br>(161.42-161.95 Mb or<br>119.4-120.5 cM) | 5.030 | GRMZM2G066197  | 161619112       | 161620899     | 1787             | adhesive/proline-rich protein               |
|                                                     | 5.030 | GRMZM5G813007  | 161658285       | 161664104     | 5819             | N-acetyl-gamma-glutamyl-phosphate reductase |
|                                                     | 5.030 | GRMZM2G396402  | 161684511       | 161685803     | 1292             | unknown                                     |
|                                                     | 5.030 | GRMZM2G396397  | 161685025       | 161693219     |                  |                                             |
|                                                     |       |                |                 |               | 8194             | NADH dehydrogenase (ubiquinone)             |
|                                                     | 5.030 | GRMZM2G096454  | 161695256       | 161696299     | 1043             | unknown                                     |
|                                                     | 5.030 | GRMZM5G898305  | 161696905       | 161700933     | 4028             | unknown                                     |
|                                                     | 5.030 | GRMZM2G096395  | 161703912       | 161705328     | 1416             | unknown                                     |
|                                                     | 5.030 | GRMZM5G893619  | 161704869       | 161705514     | 645              | unknown                                     |
|                                                     | 5.030 | GRMZM5G888034  | 161793838       | 161794406     | 568              | unknown                                     |
|                                                     | 5.030 | GRMZM2G179779  | 161801567       | 161802786     | 1219             | unknown                                     |
|                                                     | 5.030 | GRMZM2G179777  | 161804206       | 161805610     | 1404             | triacylglycerol lipase                      |
|                                                     | 5.030 | GRMZM2G479163  | 161813482       | 161823445     | 9963             | aminophospholipid ATPase 2                  |
|                                                     | 5.030 | GRMZM2G411916  | 161834088       | 161851386     | 17298            | aminophospholipid ATPase 2                  |
|                                                     | 5.030 | GRMZM2G411940  | 161854577       | 161863059     | 8482             | aminophospholipid ATPase 2                  |
|                                                     | 5.030 | GRMZM2G172657  | 161902122       | 161904577     | 2455             | GRAS family transcription factor            |

|                                                     |       |                  |           |           |      |                                                    |
|-----------------------------------------------------|-------|------------------|-----------|-----------|------|----------------------------------------------------|
|                                                     | 5.030 | GRMZM2G172726    | 161919240 | 161923252 | 4012 | unknown                                            |
|                                                     | 5.030 | AC192356.3_FG003 | 161939954 | 161944649 | 4695 | unknown                                            |
| Peak bin<br>(161.95-162.04 Mb or<br>120.5-121.4 cM) | 5.192 | GRMZM2G180490    | 161948926 | 161953678 | 4752 | adenylyl-sulfate kinase                            |
|                                                     | 5.192 | GRMZM2G010702    | 161958265 | 161959052 | 787  | unknown                                            |
|                                                     | 5.192 | GRMZM2G151649    | 162003495 | 162005287 | 1792 | ARM repeat superfamily protein                     |
|                                                     | 5.192 | GRMZM2G057023    | 162036068 | 162042246 | 6178 | Interferon-related developmental regulator         |
| Right bin<br>(162.04-162.16 Mb or<br>121.4-122 cM)  | 5.026 | GRMZM2G057176    | 162044113 | 162046668 | 2555 | Pentatricopeptide repeat (PPR) superfamily protein |
|                                                     | 5.026 | GRMZM2G357734    | 162054794 | 162062790 | 7996 | Serine C-palmitoyltransferase                      |
|                                                     | 5.026 | GRMZM2G057247    | 162068683 | 162075079 | 6396 | actin binding                                      |
|                                                     | 5.026 | GRMZM2G057260    | 162079660 | 162085372 | 5712 | MOS4-associated complex 3B                         |
|                                                     | 5.026 | AC187046.3_FG009 | 162096143 | 162097954 | 1811 | zinc knuckle family protein                        |
|                                                     | 5.026 | GRMZM2G089557    | 162149448 | 162150576 | 1128 | zinc finger, C2H2 type family protein              |
|                                                     | 5.026 | GRMZM2G089630    | 162153422 | 162157104 | 3682 | integral membrane protein like                     |

218 **Supplementary Table 10.** Comparison of published work for combination of high-throughput phenotyping and QTL/GWAS analysis.

| Species               | Population type                                           | Population size                       | Marker                     | Identified loci/QTL | Platform, sensors or software                                                             | Traits                                                         | Application                                  | Throughput                                       | Measuring efficiency | Reference *           |
|-----------------------|-----------------------------------------------------------|---------------------------------------|----------------------------|---------------------|-------------------------------------------------------------------------------------------|----------------------------------------------------------------|----------------------------------------------|--------------------------------------------------|----------------------|-----------------------|
| Arabidopsis and maize | Col-0 and C24; Three panels of diverse maize inbred lines | Arabidopsis: 2; Maize: 44, 25 and 63; | NA                         | NA                  | Visible, near-infrared, and fluorescence imaging (LemnaTec 3D Scanalyzer in IPK, Germany) | projected leaf area (Arabidopsis) and estimated volume(maize)  | Indoor phenotyping for Arabidopsis and maize | 384, 2304 or 4608 plants, up to 4600 Arabidopsis | 30 second per plant  | Junker et al., 2014   |
| Maize                 | Association population                                    | 252                                   | 50k SNPs                   | 12 loci             | Visible light imaging (LemnaTec 3D Scanalyzer in IPK, Germany)                            | Shoot biomass, biomass accumulation                            | In door shoot biomass and growth             | 384, 2304 or 4608 plants, up to 4600 Arabidopsis | 30 second per plant  | Muraya et al., 2016   |
| Wild Barley           | Introgression lines                                       | 47                                    | 1,536-SNP barley BOPA1 set | 44 QTL              | Visible light imaging (LemnaTec 3D Scanalyzer in The Plant Accelerator)                   | 14 biomass and plant growth related traits                     | Indoor phenotyping for drought tolerance     | 2400                                             | 30 second per plant  | Honsdorf et al., 2014 |
| Wheat                 | RIL population                                            | 150                                   | 3.2k SNPs                  | 20 QTL              | Visible light imaging (LemnaTec 3D Scanalyzer in The Plant Accelerator)                   | Biomass, plant weight, leaf area, average growth rate, and WUE | In door shoot phenotyping                    | 2400                                             | 30 second per plant  | Parent et al., 2015   |
| Rice                  | RIL population                                            | 171                                   | 164 SSRs and RFLP          | 89 QTL              | 3D visible light imaging, GiA Roots, Rootwork software                                    | 25 Root system architecture traits                             | Root phenotyping of growth in a gellan gum   | NA                                               | NA                   | Topp et al., 2013     |

|             |                        |                                        |                                            |                                                                   |                                                                              |                                                          |                                      |                                                 |            |                               |                           |
|-------------|------------------------|----------------------------------------|--------------------------------------------|-------------------------------------------------------------------|------------------------------------------------------------------------------|----------------------------------------------------------|--------------------------------------|-------------------------------------------------|------------|-------------------------------|---------------------------|
|             |                        |                                        |                                            |                                                                   |                                                                              |                                                          |                                      | medium                                          |            |                               |                           |
| Rice        | Association population | 242                                    | 700k SNPs                                  | 709 and 496 significant associations using two different methods. | PANorama                                                                     | 49 phenotypes                                            | panicle                              | Rice panicle architecture                       | NA         | NA                            | Crowell et al., 2016      |
| Arabidopsis | Association population | 324                                    | ~215k SNPs                                 | 26 SNPs                                                           | PHENOPSIS phenotyping platform, top-view imaging                             | Fresh weight, Projected leaf area, growth related traits |                                      | Arabidopsis leaf phenotyping                    | 540 pots   | NA                            | Bac-Molenaar et al., 2015 |
| Rice        | Association population | 167                                    | one marker per 22.5 kb                     | 51 loci                                                           | Rhizoscope phenotyping platform, Visible light imaging                       | 15 shoot and root traits                                 |                                      | Root phenotyping of growth in hydroponic system | 192 plants | NA                            | Courtois et al., 2013     |
| Rice        | Association population | three panels: 455, 469, 389 accessions | 4,358k, 2,863k, 1,959k SNPs for each panel | 382 loci                                                          | High-throughput leaf scorer (HLS), linear scanning                           | 29 leaf traits related to leaf size, shape, and color    | Fast leaf phenotyping after clipping |                                                 | NA         | 30 leaves per minute          | Yang et al., 2015         |
| Triticale   | doubled haploid lines  | 647                                    | 1710 DArT markers                          | 2 QTL                                                             | Breed Vision, 3D-Time-of-Flight camera; laser distance sensor; hyperspectral | Biomass accumulation                                     |                                      | Field phenotyping in plot level                 | NA         | more than 2,000 plots per day | Busemeyer et al., 2013    |

imaging; light curtain  
imaging

|        |                        |     |                       |         |                                                                    |                                                                                                                                                                                 |                                            |            |                                                                                     |                                  |
|--------|------------------------|-----|-----------------------|---------|--------------------------------------------------------------------|---------------------------------------------------------------------------------------------------------------------------------------------------------------------------------|--------------------------------------------|------------|-------------------------------------------------------------------------------------|----------------------------------|
| Pepper | RIL population         | 151 | 493 markers           | 10 QTL  | RGB camera and distance camera                                     | Leaf size, leaf angle, plant height, and total leaf area                                                                                                                        | Indoor phenotyping for tall plant          | 192 plants | 3 min each single row                                                               | Van et al., 2012                 |
| Rice   | Association population | 533 | 4,358 k SNPs          | 141 QTL | Visible light imaging, x-ray CT, and linear scanning (HRPF, China) | 6 shoot traits and 9 yield traits                                                                                                                                               | In door shoot phenotyping and yield traits | 5472 pots  | 45 second per plant                                                                 | Yang et al., 2014                |
| Maize  | RIL population         | 167 | 2496 recombinant bins | 988 QTL | Visible light imaging (HRPF, China)                                | 106 traits: 10 plant morphological traits, 22 leaf architecture traits, 1 plant color trait, 3 biomass related traits, 6 histogram texture traits, and 64 growth related traits | In door shoot phenotyping                  | 5472 pots  | The time costs of plant screening and image analysis for each plant were 45s and 10 | The present work in this article |

219 \*The references were listed at the end of supplementary information.

220 **Supplementary Table 11 Experimental schedule of maize plant phenotyping.**

| Experimental design                        | Time point    | Date of replicate 1 | Date of replicate 2 | Days after sowing | Sample size | Note                                                                                                             |
|--------------------------------------------|---------------|---------------------|---------------------|-------------------|-------------|------------------------------------------------------------------------------------------------------------------|
| Sowing                                     | Sowing date   | 2015.3.20           | 2015.3.21           | -                 | 721         | 2 replicates (334 maize plant) for non-destructive measurements and 387 maize plant for destructive measurements |
| Non-destructively measuring of maize plant | Time point 1  | 2015.4.11           | 2015.4.12           | 22                | 167         | Screening of the maize plant and extracting the phenotypic traits                                                |
|                                            | Time point 2  | 2015.4.14           | 2015.4.15           | 25                | 167         |                                                                                                                  |
|                                            | Time point 3  | 2015.4.17           | 2015.4.18           | 28                | 167         |                                                                                                                  |
|                                            | Time point 4  | 2015.4.20           | 2015.4.21           | 31                | 167         |                                                                                                                  |
|                                            | Time point 5  | 2015.4.23           | 2015.4.24           | 34                | 167         |                                                                                                                  |
|                                            | Time point 6  | 2015.4.26           | 2015.4.27           | 37                | 167         |                                                                                                                  |
|                                            | Time point 7  | 2015.4.29           | 2015.4.30           | 40                | 167         |                                                                                                                  |
|                                            | Time point 8  | 2015.5.2            | 2015.5.3            | 43                | 167         |                                                                                                                  |
|                                            | Time point 9  | 2015.5.5            | 2015.5.6            | 46                | 167         |                                                                                                                  |
|                                            | Time point 10 | 2015.5.8            | 2015.5.9            | 49                | 167         |                                                                                                                  |
|                                            | Time point 11 | 2015.5.11           | 2015.5.12           | 52                | 167         |                                                                                                                  |
|                                            | Time point 12 | 2015.5.14           | 2015.5.15           | 55                | 167         |                                                                                                                  |
|                                            | Time point 13 | 2015.5.17           | 2015.5.18           | 58                | 167         |                                                                                                                  |
|                                            | Time point 14 | 2015.5.20           | 2015.5.21           | 61                | 167         |                                                                                                                  |
|                                            | Time point 15 | 2015.5.23           | 2015.5.24           | 64                | 167         |                                                                                                                  |
|                                            | Time point 16 | 2015.5.26           | 2015.5.27           | 67                | 167         |                                                                                                                  |

---

|                    |       |           |   |        |        |                 |
|--------------------|-------|-----------|---|--------|--------|-----------------|
| Manually           | -     | Measuring | - | Days   | Sample | Note            |
| measuring of maize |       | date      |   | after  | size   |                 |
| plant              |       |           |   | sowing |        |                 |
|                    | 1     | 2015.4.25 | - | 36     | 103    | Measuring the   |
|                    | 2     | 2015.5.7  | - | 48     | 101    | maize plant     |
|                    | 3     | 2015.5.19 | - | 60     | 99     | height, fresh   |
|                    | 4     | 2015.5.29 | - | 70     | 84     | weight, and dry |
|                    | Total |           |   |        | 387    | weight          |

---

221 **Supplementary Table 12 The detailed information of Sub-vi and Dynamic link**  
 222 **library (DLL) used in the study.** Source code can be downloaded using the link:  
 223 [http://plantphenomics.hzau.edu.cn/checkiflogin\\_en.action](http://plantphenomics.hzau.edu.cn/checkiflogin_en.action) (Username: UserPP,  
 224 Password: 20170108pp)

| VI and DLL list        | Function Explanation                                                                               | Supplement                                                                                                                                                                                          |
|------------------------|----------------------------------------------------------------------------------------------------|-----------------------------------------------------------------------------------------------------------------------------------------------------------------------------------------------------|
| Processing.vi          | Gray image extraction and preliminary segmentation.                                                | 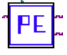                                                                                                                 |
| Index.vi               | Calculating the plant width with the binary image, in order to select the maximum side-view image. | 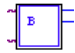                                                                                                                 |
| RegionGrow.vi          | To complete the whole plant image with the preliminary binary image and neighborhood information   | 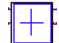                                                                                                                 |
| DensityCalculation.vi  | To calculate the image density                                                                     | 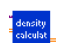                                                                                                                 |
| RatioCalculation.vi    | To obtain the plant compactness with the density information.                                      | 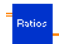                                                                                                               |
| FeaturesCalculation.vi | To calculate the plant morphological traits.                                                       | 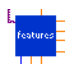                                                                                                               |
| SkeletonExtraction.vi  | To extract the skeleton and identify the maize leaf                                                | 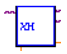                                                                                                               |
| Nebogrow.dll           | To complete the maize image.                                                                       | int Nebogrow (unsigned int<br>*pImag, // Original color<br>image<br>unsigned char *Graybuff, //<br>Preliminary binary image<br>unsigned int BWWidth, //<br>Image width<br>unsigned int BWHeight) // |
| Thinning.dll           | To extract the skeleton of maize image                                                             | int Thinning(unsigned char<br>*Array, //binary image<br>unsigned int width, //Image<br>width                                                                                                        |

|                    |                                           |                                                                                                                                                                                                                                                                                                                                                                                                                                                                                                                                                                                                                                                                                                                                                                                                                                                                                                                                                                                |
|--------------------|-------------------------------------------|--------------------------------------------------------------------------------------------------------------------------------------------------------------------------------------------------------------------------------------------------------------------------------------------------------------------------------------------------------------------------------------------------------------------------------------------------------------------------------------------------------------------------------------------------------------------------------------------------------------------------------------------------------------------------------------------------------------------------------------------------------------------------------------------------------------------------------------------------------------------------------------------------------------------------------------------------------------------------------|
|                    |                                           | <pre> unsigned int height) // Image height int FreeEndDetect(unsigned char *Array, //Skeleton image unsigned int BWWidth, // Image width unsigned int BWHeight, // Image height int *EndArray, // Endpoints int *JunctionArray) //Nodes int SkeletonFollow(unsigned char *p, //Skeleton image unsigned int _BWWidth, // Image width unsigned int _BWHeight) // Image height int pathExtra_forleaf ( unsigned char *Array, // Skeleton image unsigned int _BWWidth, // Image width unsigned int _BWHeight, // Image height ) int PathExtra_Single(unsigned char *Array, // skeleton image unsigned int _BWWidth, //image width unsigned int _BWHeight, //image height unsigned int _Xstart, //start position unsigned int _Distance, //searching distance float *leaflength, //each leaf length float *OClength, //each leaf euclidean distance double *angle, //each leaf tangency angle double *angle1, //each leaf straight angle float *WanQD, //each leaf curvature </pre> |
| FreeEndDectet.dll  | To identify the endpoints and nodes       |                                                                                                                                                                                                                                                                                                                                                                                                                                                                                                                                                                                                                                                                                                                                                                                                                                                                                                                                                                                |
| SkeletonFollow.dll | To mark each leaf and stem.               |                                                                                                                                                                                                                                                                                                                                                                                                                                                                                                                                                                                                                                                                                                                                                                                                                                                                                                                                                                                |
| PathExtra.dll      | To identify the maize leaf and stem       |                                                                                                                                                                                                                                                                                                                                                                                                                                                                                                                                                                                                                                                                                                                                                                                                                                                                                                                                                                                |
| PathForSingle.dll  | To calculate the leaf architecture traits |                                                                                                                                                                                                                                                                                                                                                                                                                                                                                                                                                                                                                                                                                                                                                                                                                                                                                                                                                                                |

---

|                  |                                                   |                                                                                                                                                                                                                                                                             |
|------------------|---------------------------------------------------|-----------------------------------------------------------------------------------------------------------------------------------------------------------------------------------------------------------------------------------------------------------------------------|
|                  |                                                   | float &Mean_length, //SLL;<br>float &Mean_OClength,<br>//LNL<br>float &Mean_WanQD, //LC<br>double &Mean_Angle, //LTA<br>double &Mean_Angle1, //LSA<br>float &lazhizhugao, //MPH<br>float &total_leaflength, //TLL<br>int &leaf_number //LN<br>) //parameters<br>calculation |
| binarization.dll | To obtain the preliminary binary image.           | void TOPim2bw2(uint8_t<br>*R, uint8_t *G, uint8_t *B,<br>int32_t row, int32_t col, float<br>EGthreshold, float<br>ERthreshold, uint8_t *bw);                                                                                                                                |
| fractaldim.dll   | To calculate the fractal dim of the plant.        | void box_counting(uint8_t<br>*bw, int32_t row, int32_t col,<br>int32_t area, float *FD);                                                                                                                                                                                    |
| HistProperty.dll | To calculate the texture features of maize plant. | uint8_t HistProperty(uint8_t<br>*Im, int32_t row, int32_t col,<br>int32_t G, double *HistStat);                                                                                                                                                                             |
| PlantType.dll    | To calculate the plant compactness feature.       | void CalLeafDens(uint8_t<br>*bw, int32_t row, int32_t col,<br>int32_t GridSize, float *dens);<br>void DensClassify(float<br>*dens, int32_t row, int32_t<br>col, float *ratio);                                                                                              |
| imFillRemove.dll | To remove the small area noise.                   | void bwremove(uint8_t<br>*bw, int32_t row, int32_t col,<br>int32_t areathreshold);                                                                                                                                                                                          |

---

225

226

227

228

---

## Supplementary Note 1. Definition of the features

● Maximum plant height in side view (MPH): With the skeleton image (Supplementary Figure 1f), the leaf length and the distance from the leaf base point to stem base point (aboveground) was calculated for each leaf; and the maximum summation was selected as the maximum plant height.

● Natural plant height in side view (NPH): With the whole binary image (Supplementary Figure 1c), the vertical distance from plant tip to stem base (aboveground) was computed as the natural plant height.

● Stem length in side view (SL): With the stem identified image (Supplementary Figure 1e), the red line was identified as the stem and the length of the red was regarded as stem length.

● Plant width in side view (PW): As shown in the whole binary image (Supplementary Figure 1c), the horizontal distance from the left first foreground pixel to the right last foreground pixel was acquired as the plant width.

● Total projected area / bounding rectangle area ratio in side view (TBR): With the whole binary image (Supplementary Figure 1c), the TBR was calculated by the ratio of total projected area to the bounding rectangle area.

● Plant perimeter in side view (PP): With the whole binary image (Supplementary Figure 1c), the contour of the plant area was extracted and the PP was calculated as the summation of the foreground pixels.

● Plant compactness in side view (PC): Divide the image into several sub-images using a  $(5 \times 5)$  window. And calculate the ratio of the foreground pixels to the total number of pixels in each sub-image  $(5 \times 5)$ , denoted as plant compactness in each sub-image (PCs). Then Count the number of PCs belonging to the class: 80-100%, denoted as ND. At last, leaf compactness (PC) was computed as the percentage of ND compared to the total PCs number.

● Fractal dimension with/without image cropping in side view: Superimpose boxes with box size of  $\delta_k$  on the interested object, and calculate the number of boxes that are needed to cover the object, denoted as  $N_{\delta_k}$ . Repeat this process with reducing  $\delta_k$

---

258 until  $\delta_k$  approaches pixel size. Fractal dimension was calculated using the following  
 259 Equation. The fractal dimension for the image cropped by the minimum bounding  
 260 rectangle was calculated as the fractal dimension with image cropping (FDIC). On the  
 261 contrary, the fractal dimension for non-cropping image was computed as the fractal  
 262 dimension without image cropping (FDNIC).

$$263 \quad FD = \lim_{\delta_k \rightarrow 0} \frac{\ln N_{\delta_k}}{-\ln \delta_k} \quad (1)$$

264 ● Total leaf length per plant (TLL): With the skeleton image (Supplementary Figure  
 265 1f), each leaf was identified and the leaf length was calculated. The TLL is the  
 266 summation of all the leaf length.

267 ● Leaf number per plant (LN): As shown in the skeleton image (Supplementary  
 268 Figure 1f), each leaf was identified and labeled with different color. The color number  
 269 indicated the leaf number per plant.

270 ● Average straightened leaf length per plant (SLL): As shown in the skeleton image  
 271 (Supplementary Figure 1f), the leaf length was extracted as the straightened distance  
 272 from leaf tip to leaf base, and then SLL was calculated by the average value of all the  
 273 leaf length.

274 ● Average distance between the leaf tip and node per plant (LNL): As shown in the  
 275 skeleton image (Supplementary Figure 1f), the leaf distance was extracted as the  
 276 natural distance from leaf tip to leaf base, and then LNL was calculated by the  
 277 average value of all the leaf distance.

278 ● Average leaf curvature per plant (LC): As shown in the skeleton image  
 279 (Supplementary Figure 1f), the leaf curvature was computed by the ratio of leaf  
 280 distance to leaf length, and then LC was calculated as the average value of all the leaf  
 281 curvature.

282 ● Average leaf tangency angle per plant (LTA): As shown in the skeleton image  
 283 (Supplementary Figure 1f), leaf tangency angle was defined as the angle of leaf base  
 284 tangent line and stem line, and then LTA was calculated as the average value of all the  
 285 leaf tangency angle.

286 ● Average leaf straight angle per plant (LSA): As shown in the skeleton image

---

(Supplementary Figure 1f), leaf straight angle was defined as the angle of the leaf distance line and stem line, and then LSA was calculated as the average value of all the leaf straight angle.

● Average straightened leaf length in lower half of plant (SLL\_below) and average straightened leaf length in upper half of plant (SLL\_above): From the top leaf to the bottom leaf, SLL of all the leaves were averagely divided to 2 parts: upper half part and below half part. The average of SLL in below half part was identified as SLL\_below, and the average of SLL in upper half part was identified as SLL\_above.

● Average distance between the leaf tip and node in lower half of plant (LNL\_below) and average distance between the leaf tip and node in upper half of plant (LNL\_above): From the top leaf to the bottom leaf, LNL of all the leaves were averagely divided to 2 parts: upper half part and below half part. The average of LNL in below half part was identified as LNL\_below, and the average of LNL in upper half part was identified as LNL\_above.

● Average leaf curvature in lower half of plant (LC\_below) and average leaf curvature in upper half of plant (LC\_above): From the top leaf to the bottom leaf, LC of all the leaves were averagely divided to 2 parts: upper half part and below half part. The average of LC in below half part was identified as LC\_below, and the average of LC in upper half part was identified as LC\_above.

● Average of leaf tangency angle in lower half of plant (LTA\_below) and average of leaf tangency angle in upper half of plant (LTA\_above): From the top leaf to the bottom leaf, LTA of all the leaves were averagely divided to 2 parts: upper half part and below half part. The average of LTA in below half part was identified as LTA\_below, and the average of LTA in upper half part was identified as LTA\_above.

● Average of leaf straight angle in lower half of plant (LSA\_below) and average of leaf straight angle in upper half of plant (LSA\_above): From the top leaf to the bottom leaf, LSA of all the leaves were averagely divided to 2 parts: upper half part and below half part. The average of LSA in below half part was identified as LSA\_below, and the average of LSA in upper half part was identified as LSA\_above.

● Green color value (GCA): the ExG value was computed for each foreground

317 pixel in the grayscale image and the average value was calculated as the green color  
318 value.

- 319 ● Side Projected area (SA): Number of foreground pixels in the side-view image.
- 320 ● The 6 histogram features, including the mean value (M\_TEX), the standard error  
321 (SE\_TEX), the third moment (MU3\_TEX), the uniformity (U\_TEX), the smoothness  
322 (S\_TEX) and the entropy (E\_TEX), were calculated using the following equations.

$$323 \quad M = \sum_{i=0}^{L-1} G_i p(G_i) \quad (2)$$

$$324 \quad SE = \sqrt{\sum_{i=0}^{L-1} (G_i - M)^2 p(G_i)} \quad (3)$$

$$325 \quad MU3 = \sum_{i=0}^{L-1} (G_i - M)^3 p(G_i) \quad (4)$$

$$326 \quad U = \sum_{i=0}^{L-1} p^2(G_i) \quad (5)$$

$$327 \quad S = 1 - \frac{1}{1 + SE^2} \quad (6)$$

- 328 ● Absolute growth rate (AGR<sub>i</sub>): the absolute growth rate was calculated using the  
329 following equation:

$$330 \quad AGR_i = Biomass_{i+1} - Biomass_i \quad (i=1,...,15) \quad (7)$$

331 Where Biomass was fresh weight or dry weight at *ith* time points.

- 332 ● Relative growth rate (RGR<sub>i</sub>): the relative growth rate was calculated using the  
333 following equation:

$$334 \quad RGR_i = \frac{Biomass_{i+1} - Biomass_i}{Biomass_i} \quad (i=1,...,15) \quad (8)$$

335 Where Biomass<sub>i</sub> was fresh weight or dry weight at *ith* time points.

336

337

338

---

339 **References**

340 The references mentioned in the Supplementary Table 10 were listed as follows:

341

342 **Bac-Molenaar JA, Vreugdenhil D, Granier C, Keurentjes JJ** (2015) Genome-wide  
343 association mapping of growth dynamics detects time-specific and general  
344 quantitative trait loci. *J Exp Bot* **66**: 5567-5580

345 **Bussemeyer L, Ruckelshausen A, Moller K, Melchinger AE, Alheit KV, Maurer**  
346 **HP, Hahn V, Weissmann EA, Reif JC, Wurschum T** (2013) Precision  
347 phenotyping of biomass accumulation in triticales reveals temporal genetic  
348 patterns of regulation. *Sci Rep* **3**: 2442

349 **Courtois B, Audebert A, Dardou A, Roques S, Ghneim-Herrera T, Droc G,**  
350 **Frouin J, Rouan L, Goze E, Kilian A, Ahmadi N, Dingkuhn M** (2013)  
351 Genome-wide association mapping of root traits in a japonica rice panel. *PLoS*  
352 *One* **8**: e78037

353 **Crowell S, Korniliev P, Falcao A, Ismail A, Gregorio G, Mezey J, McCouch S**  
354 (2016) Genome-wide association and high-resolution phenotyping link *Oryza*  
355 *sativa* panicle traits to numerous trait-specific QTL clusters. *Nat Commun* **7**:  
356 10527

357 **Honsdorf N, March TJ, Berger B, Tester M, Pillen K** (2014) High-throughput  
358 phenotyping to detect drought tolerance QTL in wild barley introgression lines.  
359 *PLoS One* **9**: e97047

360 **Junker A, Muraya MM, Weigelt-Fischer K, Arana-Ceballos F, Klukas C,**  
361 **Melchinger AE, Meyer RC, Riewe D, Altmann T** (2014) Optimizing  
362 experimental procedures for quantitative evaluation of crop plant performance  
363 in high throughput phenotyping systems. *Front Plant Sci* **5**: 770

364 **Muraya MM, Chu J, Zhao Y, Junker A, Klukas C, Reif JC, Altmann T** (2016)  
365 Genetic variation of growth dynamics in maize (*Zea mays* L.) revealed  
366 through automated non-invasive phenotyping. *Plant J*

367 **Parent B, Shahinnia F, Maphosa L, Berger B, Rabie H, Chalmers K, Kovalchuk**  
368 **A, Langridge P, Fleury D** (2015) Combining field performance with  
369 controlled environment plant imaging to identify the genetic control of growth  
370 and transpiration underlying yield response to water-deficit stress in wheat. *J*  
371 *Exp Bot* **66**: 5481-5492

372 **Topp CN, Iyer-Pascuzzi AS, Anderson JT, Lee CR, Zurek PR, Symonova O,**  
373 **Zheng Y, Bucksch A, Mileyko Y, Galkovskyi T, Moore BT, Harer J,**  
374 **Edelsbrunner H, Mitchell-Olds T, Weitz JS, Benfey PN** (2013) 3D  
375 phenotyping and quantitative trait locus mapping identify core regions of the  
376 rice genome controlling root architecture. *Proc Natl Acad Sci U S A* **110**:  
377 E1695-1704

378 **Van dHG, Song Y, Horgan G, Polder G, Dieleman A, Bink M, Palloix A, Van EF,**  
379 **Glasbey C** (2012) SPICY: towards automated phenotyping of large pepper  
380 plants in the greenhouse. *Funct Plant Biol* **39**: 870-877

381 **Yang W, Guo Z, Huang C, Duan L, Chen G, Jiang N, Fang W, Feng H, Xie W,**  
382 **Lian X, Wang G, Luo Q, Zhang Q, Liu Q, Xiong L** (2014) Combining

---

383 high-throughput phenotyping and genome-wide association studies to reveal  
384 natural genetic variation in rice. Nat Commun **5**: 5087  
385 **Yang W, Guo Z, Huang C, Wang K, Jiang N, Feng H, Chen G, Liu Q, Xiong L**  
386 (2015) Genome-wide association study of rice (*Oryza sativa* L.) leaf traits with  
387 a high-throughput leaf scorer. J Exp Bot **66**: 5605-561  
388
